# Supplementary material for: <strong></strong>COVID-19: Prediction of Vulnerable Areas Having High Risk of Becoming Hostspots and Providing Necessary Statistics during COVID-19 Pandemic
Source: Preprints.org preprint supplement (doi:10.20944/preprints202005.0298.v1), 2020-05-18
Supplement: Supplementary file 1 [file supplementary]

So, We have your consent right?	Age	Gender	State or Union Territory of Residence	ZIP/Postal Code/PIN Code	What type of Mask or Face coverings do you use or have access to?	Do you use or have access to gloves, when in need?	Do you have access to Handwash/Sanitizer , and use them properly?	Do you clean common areas around your house, Like Door handles,Tables,etc, with soap water or disinfectant?	Do you have any chronic illness?	What probability do you think you have (given your Surroundings) of catching the Novel Coronavirus?	Are You a Doctor, Nurse or HealthCare worker who is actively taking care of Coranavirus Infected patients?(Next Part Of the Survey is only For Medical Professionals taking Care of Coronavirus Patients)	Do you Have adequate PPE(Personal Protective Equipment) for you to carry out your work?	Do you have adequate amount of Medical Equipment at your place of work?	Are the patients Co-operative with the health care procedures and Quarantine imposed on them in isolation ward?
Yes	20	Female	Uttar Pradesh	262001	Surgical Mask	Yes	Yes	Yes	No	1	No
Yes	21	Male	Uttar Pradesh	284001	Bandana/Scarf/Handkerchief	No	Yes	Yes	No	4	No
Yes	20	Male	Uttar Pradesh	250001	Bandana/Scarf/Handkerchief	No	Yes	Yes	No	2	No
Yes	19	Male	Uttar Pradesh	202002	Surgical Mask	Yes	Yes	Yes	No	2	No
Yes	20	Male	Uttar Pradesh	282001	Surgical Mask	No	Yes	Yes	No	6	No
Yes	19	Male	Uttar Pradesh	201002	N95/N99 Respirators	Yes	Yes	Yes	No	2	No
Yes	21	Female	Uttar Pradesh	211015	Bandana/Scarf/Handkerchief	Yes	Yes	Yes	No	1	No
Yes	20	Female	Uttar Pradesh	251001	Bandana/Scarf/Handkerchief	No	No	Yes	No	4	No
Yes	20	Male	Jharkhand	831011	N95/N99 Respirators	Yes	Yes	No	No	2	No
Yes	23	Male	Uttar Pradesh	226003	Surgical Mask	Yes	Yes	Yes	No	1	Yes	Yes	Yes	Some are Some are Not
Yes	20	Female	Uttar Pradesh	226010	Cotton Mask	Yes	Yes	Yes	No	1	No
Yes	21	Female	Uttarakhand	248001	Surgical Mask	No	Yes	Yes	No	3	No
Yes	19	Male	Madhya Pradesh	485001	Surgical Mask	No	No	Yes	No	1	No
Yes	21	Female	Uttarakhand	248001	Surgical Mask	Yes	Yes	Yes	No	2	No
Yes	20	Male	Uttar Pradesh	226010	Surgical Mask	Yes	Yes	Yes	No	8	No
Yes	21	Female	Uttarakhand	248006	Bandana/Scarf/Handkerchief	Yes	Yes	Yes	No	2	No
Yes	19	Female	Uttar Pradesh	201012	Surgical Mask	No	Yes	Yes	No	3	No
Yes	20	Female	Uttar Pradesh	201002	N95/N99 Respirators	No	Yes	Yes	No	2	No
Yes	19	Male	Uttar Pradesh	201002	Surgical Mask	Yes	Yes	Yes	No	1	No
Yes	19	Male	Uttar Pradesh	251001	N95/N99 Respirators	Yes	Yes	Yes	No	1	No
Yes	19	Female	Uttar Pradesh	250001	N95/N99 Respirators	Yes	Yes	Yes	No	1	No
Yes	22	Male	Uttar Pradesh	284002	Bandana/Scarf/Handkerchief	Yes	Yes	Yes	No	1	No
Yes	19	Male	Uttar Pradesh	226022	Bandana/Scarf/Handkerchief	Yes	Yes	Yes	No	2	No
Yes	19	Male	Uttar Pradesh	228001	N95/N99 Respirators	Yes	Yes	Yes	No	2	No
Yes	19	Male	Uttar Pradesh	250001	Bandana/Scarf/Handkerchief	No	Yes	Yes	No	1	No
Yes	20	Female	Uttar Pradesh	201012	Surgical Mask	Yes	Yes	Yes	No	3	No
Yes	20	Male	Uttar Pradesh	201010	N95/N99 Respirators	Yes	Yes	Yes	No	3	No
Yes	19	Male	Uttar Pradesh	203001	N95/N99 Respirators	Yes	Yes	Yes	No	2	No
Yes	19	Male	Uttar Pradesh	226029	Surgical Mask	Yes	Yes	Yes	No	5	No
Yes	19	Male	Uttar Pradesh	226024	Surgical Mask	Yes	Yes	No	No	3	No
Yes	20	Female	Uttar Pradesh	262001	Bandana/Scarf/Handkerchief	No	Yes	No	No	2	No
Yes	18	Male	Uttar Pradesh	208002	N95/N99 Respirators	Yes	Yes	Yes	No	2	No
Yes	20	Female	Uttar Pradesh	226028	Cotton Mask	No	Yes	Yes	No	1	No
Yes	21	Female	Uttar Pradesh	226024	Cotton Mask	No	Yes	Yes	No	2	No
Yes	18	Female	Andhra Pradesh	523157	Bandana/Scarf/Handkerchief	Yes	Yes	No	Yes	6	No
Yes	20	Male	Uttar Pradesh	226024	Surgical Mask	Yes	Yes	No	No	1	No
Yes	21	Male	Uttar Pradesh	273015	Surgical Mask	No	Yes	Yes	No	1	No
Yes	19	Male	West Bengal	713304	Surgical Mask	No	Yes	Yes	No	2	No
Yes	17	Male	Uttar Pradesh	262001	Surgical Mask	No	Yes	Yes	No	1	No
Yes	33	Male	Rajasthan	324005	Bandana/Scarf/Handkerchief	No	Yes	Yes	No	4	No
Yes	18	Female	Uttar Pradesh	281123	Bandana/Scarf/Handkerchief	No	No	No	No	3	No
Yes	18	Female	Uttarakhand	246174	Bandana/Scarf/Handkerchief	No	No	Yes	No	5	No
Yes	19	Female	Uttar Pradesh	220622	Surgical Mask	Yes	Yes	Yes	No	1	No
Yes	19	Male	Uttarakhand	244713	Surgical Mask	Yes	Yes	Yes	No	3	No
Yes	19	Male	Uttar Pradesh	244001	Surgical Mask	No	Yes	Yes	No	1	No
Yes	18	Male	Jharkhand	815301	Surgical Mask	No	Yes	Yes	No	2	No
Yes	20	Male	Uttar Pradesh	208021	Bandana/Scarf/Handkerchief	No	Yes	Yes	No	1	No
Yes	18	Female	Gujarat	380060	Bandana/Scarf/Handkerchief	Yes	No	No	No	5	No
Yes	19	Male	Uttar Pradesh	262001	Bandana/Scarf/Handkerchief	Yes	Yes	Yes	No	2	No
Yes	20	Female	Uttar Pradesh	226012	Surgical Mask	Yes	Yes	Yes	No	1	No
Yes	21	Male	Uttar Pradesh	226002	Surgical Mask	No	No	No	No	6	No
Yes	20	Male	Uttar Pradesh	285001	Cotton Mask	No	Yes	Yes	No	1	No
Yes	18	Female	Uttar Pradesh	226016	Surgical Mask	Yes	Yes	Yes	No	2	No
Yes	22	Male	Uttar Pradesh	283136	Cotton Mask	No	Yes	No	No	1	No
Yes	20	Male	Bihar	823001	Surgical Mask	No	Yes	No	No	1	No
Yes	20	Male	Uttar Pradesh	273012	N95/N99 Respirators	Yes	Yes	Yes	No	4	No
Yes	18	Male	Uttar Pradesh	226002	Cotton Mask	No	Yes	No	No	1	No
Yes	20	Female	Bihar	848101	Surgical Mask	Yes	Yes	Yes	No	2	No
Yes	20	Male	Maharashtra	431509	Cotton Mask	No	Yes	No	No	4	No
Yes	20	Male	Uttar Pradesh	276303	Cotton Mask	No	Yes	Yes	No	1	Yes	Yes	Yes	No
Yes	20	Male	Uttar Pradesh	230001	Surgical Mask	No	Yes	Yes	No	1	No
Yes	20	Female	Delhi(National Capital Territory)	110016	N95/N99 Respirators	Yes	Yes	Yes	No	3	No
Yes	19	Male	Madhya Pradesh	452010	Bandana/Scarf/Handkerchief	Yes	Yes	Yes	No	4	No
Yes	19	Female	Haryana	125033	Surgical Mask	Yes	Yes	Yes	No	4	No
Yes	20	Male	Uttarakhand	247667	Surgical Mask			Yes	No	1	No
Yes	19	Male	Uttar Pradesh	273001	Surgical Mask	No	Yes	Yes	No	2	No
Yes	21	Male	Uttar Pradesh	201306	Surgical Mask	Yes	Yes	Yes	No	6	No
Yes	19	Male	Uttar Pradesh	273013	Surgical Mask	No	Yes	Yes	Yes	2	No
Yes	19	Male	Haryana	121001	Surgical Mask	Yes	Yes	Yes	No	1	No
No
Yes	22	Male	Uttar Pradesh	201001	Bandana/Scarf/Handkerchief	Yes	Yes	No	No	1	No
Yes	20	Male	Uttar Pradesh	250001	N95/N99 Respirators	No	Yes	Yes	No	2	No
Yes	19	Male	Uttar Pradesh	233001	Surgical Mask	No	Yes	Yes	No	3	No
Yes	19	Female	Chhattisgarh	493118	Bandana/Scarf/Handkerchief	No	Yes	No	No	3	No
Yes	20	Male	Uttar Pradesh	205406	Surgical Mask	Yes	Yes	Yes	No	3	No
Yes	19	Male	Uttar Pradesh	226023	Cotton Mask	No	Yes	Yes	No	8	No
Yes	18	Female	Uttar Pradesh	224001	Surgical Mask	Yes	Yes	Yes	No	1	No
Yes	20	Male	West Bengal	713204	N95/N99 Respirators	No	Yes	No	No	8	No
Yes	20	Male	Uttar Pradesh	282001	Surgical Mask	Yes	Yes	No	No	5	No
Yes	21	Male	Delhi(National Capital Territory)	122001	N95/N99 Respirators	Yes	Yes	Yes	No	3	No
Yes	19	Male	Madhya Pradesh	485001	Bandana/Scarf/Handkerchief	No	No	No	No	1	No
Yes	20	Male	Haryana	122002	Cotton Mask	Yes	Yes	Yes	No	1	No
Yes	21	Male	Haryana	124001	N95/N99 Respirators	Yes	Yes	Yes	No	1	No
Yes	20	Male	Haryana	123001	N95/N99 Respirators	Yes	Yes	Yes	No	3	No
Yes	19	Male	Uttar Pradesh	201009	N95/N99 Respirators	Yes	Yes	Yes	No	2	No
No
Yes	20	Male	Uttar Pradesh	201206	N95/N99 Respirators	No	Yes	Yes	No	5	No
Yes	19	Male	Delhi(National Capital Territory)	110052	Bandana/Scarf/Handkerchief	No	Yes	Yes	No	3	No
Yes	19	Male	Uttar Pradesh	202002	N95/N99 Respirators	No	Yes	Yes	No	2	No
Yes	22	Male	Delhi(National Capital Territory)	110015	Surgical Mask	No	Yes	No	No	5	No
Yes	20	Male	Uttar Pradesh	226010	N95/N99 Respirators	Yes	Yes	Yes	No	2	No
Yes	19	Female	Haryana	121001	Surgical Mask	Yes	Yes	Yes	No	5	No
Yes	20	Male	Uttar Pradesh	201001	Surgical Mask	No	Yes	No	No	6	No
Yes	20	Male	Uttar Pradesh	230001	Bandana/Scarf/Handkerchief	No	Yes	No	No	1	No
Yes	20	Female	Uttar Pradesh	208013	N95/N99 Respirators	No	Yes	Yes	No	3	No
No
Yes	21	Male	Uttar Pradesh	201012	No, I don't have access to any of the above.	No	Yes	Yes	No	1	No
Yes	19	Male	Uttarakhand	248001	Surgical Mask	No	Yes	Yes	No	5	No
Yes	22	Male	Uttarakhand	248001	Cotton Mask	No	Yes	No	No	5	No
Yes	18	Male	Telangana	507210	Cotton Mask	No	Yes	Yes	No	4	No
Yes	19	Male	Uttar Pradesh	201002	Surgical Mask	Yes	Yes	Yes	Yes	8	No
Yes	18	Male	Punjab	152001	Surgical Mask	Yes	Yes	Yes	No	1	No
Yes	21	Male	Uttar Pradesh	201001	Surgical Mask	Yes	No	Yes	No	10	No
Yes	18	Male	Uttar Pradesh	226020	Surgical Mask	Yes	Yes	Yes	No	1	No
Yes	19	Female	Uttar Pradesh	202001	N95/N99 Respirators	No	Yes	No	No	2	No
Yes	20	Male	Uttar Pradesh	247232	Cotton Mask	No	Yes	No	No	3	No
Yes	18	Male	Uttar Pradesh	250406	Cotton Mask	No	Yes	No	No	1	No
Yes	19	Male	Uttar Pradesh	201001	Surgical Mask	No	Yes	Yes	No	4	No
Yes	19	Male	Uttar Pradesh	201001	Cotton Mask	No	Yes	Yes	No	4	No
Yes	19	Male	Uttar Pradesh	226020	Surgical Mask	Yes	Yes	Yes	No	3	No
Yes	19	Female	Madhya Pradesh	452001	Surgical Mask	No	Yes	No	No	6	No
Yes	20	Male	Uttar Pradesh	203202	Surgical Mask	No	Yes	Yes	No	1	No
Yes	23	Male	Uttar Pradesh	201301	Surgical Mask	No	Yes	No	No	2	Yes	Yes	Yes	Yes
Yes	19	Male	Uttar Pradesh	233001	Bandana/Scarf/Handkerchief	No	Yes	Yes	No	1	No
Yes	19	Female	Bihar	805110	Surgical Mask	No	Yes	No	No	3	No
Yes	18	Male	Uttar Pradesh	360003	N95/N99 Respirators	Yes	Yes	Yes	No	2	No
Yes	18	Male	Uttar Pradesh	284403	Surgical Mask	Yes	Yes	Yes	No	1	No
No
No
Yes	20	Female	Uttar Pradesh	281006	N95/N99 Respirators	Yes	Yes	No	No	2	No
Yes	22	Female	Punjab	332746	No, I don't have access to any of the above.	No	No	No	Yes	10	Yes	No	No	No
Yes	19	Female	Uttar Pradesh	208017	Surgical Mask	Yes	Yes	Yes	No	2	No
Yes	19	Male	Uttar Pradesh	201002	Surgical Mask	Yes	Yes	Yes	No	4	No
Yes	19	Male	Uttar Pradesh	282007	N95/N99 Respirators	Yes	Yes	Yes	No	1	No
Yes	20	Male	Uttar Pradesh	282001	Surgical Mask	Yes	Yes	Yes	No	2	No
Yes	19	Male	Uttar Pradesh	243722	Surgical Mask	Yes	Yes	Yes	No	7	No
Yes	17	Male	Uttar Pradesh	273014	Bandana/Scarf/Handkerchief	No	Yes	No	No	5	No
Yes	19	Male	Punjab	148001	N95/N99 Respirators	No	Yes	No	No	2	No
Yes	19	Female	Bihar	800003	Cotton Mask	No	Yes	No	Yes	4	No
Yes	21	Male	Madhya Pradesh	462003	Cotton Mask	Yes	Yes	Yes	No	1	No
Yes	18	Male	Uttar Pradesh	208023	N95/N99 Respirators	Yes	Yes	Yes	No	1	No
Yes	19	Male	Uttar Pradesh	282006	Surgical Mask	Yes	Yes	Yes	No	1	No
Yes	20	Male	Uttar Pradesh	201010	N95/N99 Respirators	Yes	Yes	Yes	No	4	No
Yes	18	Female	Uttar Pradesh	201002	N95/N99 Respirators	No	Yes	Yes	No	7	No
Yes	18	Male	Madhya Pradesh	482001	N95/N99 Respirators	Yes	Yes	Yes	No	3	No
No
Yes	19	Male	Uttar Pradesh	262202	Bandana/Scarf/Handkerchief	No	Yes	No	No	10	No
Yes	20	Female	Uttar Pradesh	201002	N95/N99 Respirators	Yes	Yes	Yes	No	5	No
Yes	18	Male	Haryana	124507	Cotton Mask	No	Yes	Yes	No	1	No
Yes	19	Male	Uttar Pradesh	201002	Surgical Mask	No	Yes	Yes	No	6	No
Yes	18	Male	Uttar Pradesh	281001	Surgical Mask	Yes	Yes	No	No	3	No
Yes	20	Female	Uttar Pradesh	242001	Surgical Mask	No	Yes	Yes	No	4	No
Yes	19	Male	Odisha	751015	Surgical Mask	No	Yes	No	No	4	No
Yes	22	Male	Uttar Pradesh	250002	N95/N99 Respirators	Yes	Yes	Yes	No	2	No
Yes	20	Male	Rajasthan	311001	Cotton Mask	Yes	Yes	Yes	No	4	No
Yes	20	Male	Madhya Pradesh	487001	Surgical Mask	Yes	Yes	Yes	No	1	No
Yes	19	Male	Uttar Pradesh	226025	Cotton Mask	No	Yes	Yes	No	4	No
Yes	19	Female	Maharashtra	400013	Surgical Mask	No	Yes	No	No	10	No
Yes	20	Male	Uttar Pradesh	250001	Surgical Mask	No	Yes	Yes	No	6	No
Yes	23	Male	Uttar Pradesh	283203	Bandana/Scarf/Handkerchief	No	Yes	Yes	No	8	No
Yes	19	Female	Uttar Pradesh	250404	Cotton Mask	Yes	Yes	Yes	No	1	No
Yes	19	Male	Uttar Pradesh	250110	Surgical Mask	No	Yes	Yes	No	5	No
Yes	19	Male	Karnataka	560078	Surgical Mask	Yes	Yes	No	No	3	No
Yes	18	Male	Uttar Pradesh	224005	N95/N99 Respirators	No	Yes	No	No	6	No
Yes	20	Female	Uttar Pradesh	201001	Surgical Mask	Yes	Yes	Yes	No	9	No
Yes	20	Male	Uttar Pradesh	242001	Surgical Mask	No	Yes	Yes	No	1	No
Yes	18	Male	Uttar Pradesh	205001	No, I don't have access to any of the above.	No	Yes	Yes	No	1	No
Yes	30	Female	Uttar Pradesh	201301	Bandana/Scarf/Handkerchief	No	Yes	Yes	No	4	No
Yes	20	Female	Uttar Pradesh	201306	Surgical Mask	Yes	Yes	Yes	No	1	No
Yes	28	Female	Delhi(National Capital Territory)	110009	N95/N99 Respirators	Yes	Yes	No	No	2	No
Yes	19	Female	Uttar Pradesh	201002	N95/N99 Respirators	Yes	Yes	Yes	No	5	No
Yes	21	Male	Uttar Pradesh	223222	Surgical Mask	No	No	Yes	No	4	No
Yes	18	Male	Andhra Pradesh	523001	Surgical Mask	No	Yes	No	No	2	No
Yes	32	Male	Tamil Nadu	600097	N95/N99 Respirators	Yes	Yes	Yes	No	6	No
Yes	18	Male	Uttar Pradesh	246734	Cotton Mask	No	Yes	Yes	No	2	No
Yes	23	Male	Uttar Pradesh	251001	No, I don't have access to any of the above.	No	Yes	Yes	Yes	5	No
Yes	19	Male	Rajasthan	324010	Surgical Mask	No	Yes	Yes	Yes	3	No
Yes	18	Female	Telangana	500044	Surgical Mask	No	Yes	Yes	No	1	No
Yes	20	Male	Uttar Pradesh	205265	N95/N99 Respirators	Yes	Yes	Yes	No	2	Yes	No	No	Some are Some are Not
Yes	43	Female	Tamil Nadu	627114	Bandana/Scarf/Handkerchief	Yes	Yes	Yes	No	1	No
Yes	18	Male	Delhi(National Capital Territory)	110092	Surgical Mask	No	Yes	Yes	No	5	No
Yes	21	Male	Uttar Pradesh	282001	Bandana/Scarf/Handkerchief	Yes	Yes	Yes	No	3	No
Yes	19	Male	Uttar Pradesh	250004	Bandana/Scarf/Handkerchief	No	Yes	Yes	No	4	No
Yes	18	Male	Uttar Pradesh	272162	Bandana/Scarf/Handkerchief	No	Yes	No	No	3	No
Yes	20	Male	Uttar Pradesh	201002	Cotton Mask	No	Yes	No	No	4	No
Yes	18	Male	Uttar Pradesh	206244	Bandana/Scarf/Handkerchief	No	Yes	No	No	4	No
Yes	21	Male	Uttar Pradesh	251002	Bandana/Scarf/Handkerchief	No	Yes	Yes	Yes	4	No
Yes	21	Male	Uttar Pradesh	250406	N95/N99 Respirators	Yes	Yes	Yes	No	2	No
Yes	19	Male	Rajasthan	305404	Bandana/Scarf/Handkerchief	No	Yes	No	No	1	No
Yes	21	Female	Uttar Pradesh	282005	Cotton Mask	No	Yes	No	No	5	No
Yes	29	Female	Uttar Pradesh	221001	No, I don't have access to any of the above.	Yes	Yes	Yes	No	5	No
Yes	19	Female	Uttar Pradesh	201006	N95/N99 Respirators	Yes	Yes	Yes	No	1	No
Yes	19	Male	Uttar Pradesh	250001	Surgical Mask	No	Yes	Yes	No	3	No
Yes	18	Male	Rajasthan	328026	Surgical Mask	Yes	Yes	No	No	3	No
Yes	20	Female	Uttar Pradesh	226021	Cotton Mask	Yes	Yes	Yes	No	2	No
Yes	19	Male	Bihar	824101	Bandana/Scarf/Handkerchief	No	Yes	No	No	2	No
Yes	21	Male	Mizoram	474001	Bandana/Scarf/Handkerchief	No	Yes	No	No	3	No
Yes	19	Female	Uttar Pradesh	250004	N95/N99 Respirators	Yes	Yes	Yes	No	3	No
Yes	19	Male	Meghalya	793003	N95/N99 Respirators	Yes	Yes	Yes	No	1	No
Yes	20	Female	Uttar Pradesh	225301	Surgical Mask	Yes	Yes	No	No	4	No
Yes	19	Male	Uttar Pradesh	226029	Cotton Mask	No	Yes	Yes	No	2	No
Yes	19	Female	Delhi(National Capital Territory)	201001	Bandana/Scarf/Handkerchief	No	Yes	Yes	No	3	No
Yes	19	Female	Bihar	841405	Cotton Mask	No	Yes	Yes	No	1	No
Yes	20	Male	Uttar Pradesh	203207	Surgical Mask	No	Yes	Yes	No	6	No
Yes	20	Male	Punjab	140117	Surgical Mask	No	Yes	Yes	No	8	No
Yes	18	Male	Uttar Pradesh	226014	Cotton Mask	Yes	Yes	Yes	No	6	No
Yes	51	Male	Uttar Pradesh	221010	Cotton Mask	No	Yes	Yes	Yes	2	No
Yes	18	Female	West Bengal	711101	Surgical Mask	Yes	Yes	Yes	No	1	No
Yes	19	Male	Uttar Pradesh	226025	Cotton Mask	Yes	Yes	Yes	Yes	2	No
Yes	20	Male	Uttar Pradesh	221005	Surgical Mask	Yes	Yes	No	No	1	No
Yes	19	Female	Tamil Nadu	628501	Surgical Mask	No	Yes	Yes	No	3	No
Yes	18	Male	Punjab	147001	Surgical Mask	Yes	Yes	Yes	No	2	No
Yes	20	Female	Uttar Pradesh	284419	Cotton Mask	No	Yes	Yes	No	1	No
Yes	19	Male	Uttar Pradesh	284126	Cotton Mask	No	Yes	Yes	No	1	No
Yes	21	Male	Uttar Pradesh	250110	Surgical Mask	Yes	Yes	No	No	2	No
Yes	19	Male	Uttar Pradesh	282010	N95/N99 Respirators	Yes	Yes	Yes	Yes	2	No
Yes	21	Male	Delhi(National Capital Territory)	110027	Surgical Mask	Yes	Yes	No	No	5	No
Yes	19	Male	Rajasthan	342001	Surgical Mask	Yes	Yes	Yes	No	4	No
Yes	20	Male	Haryana	123021	Surgical Mask	Yes	Yes	Yes	No	1	No
Yes	19	Female	Haryana	123029	N95/N99 Respirators	No	Yes	No	No	1	No
Yes	19	Male	Delhi(National Capital Territory)	110033	Surgical Mask	Yes	Yes	Yes	No	2	No
Yes	21	Male	Delhi(National Capital Territory)	110020	N95/N99 Respirators	Yes	Yes	Yes	No	2	No
Yes	19	Male	Delhi(National Capital Territory)	110029	Surgical Mask	No	Yes	Yes	No	3	No
No
Yes	20	Male	Bihar	803101	Cotton Mask	No	Yes	Yes	No	1	No
Yes	20	Male	Uttar Pradesh	224001	Cotton Mask	Yes	Yes	Yes	No	2	No
Yes	21	Male	Uttar Pradesh	281403	Surgical Mask	Yes	Yes	No	No	1	No
Yes	28	Male	Delhi(National Capital Territory)	110029	N95/N99 Respirators	No	Yes	No	Yes	10	No
Yes	20	Female	Uttar Pradesh	205248	Bandana/Scarf/Handkerchief	No	Yes	Yes	Yes	1	No
Yes	20	Male	Gujarat	390021	Surgical Mask	No	Yes	Yes	No	1	No
Yes	18	Male	Uttar Pradesh	226001	Cotton Mask	No	Yes	Yes	No	2	No
Yes	20	Male	Andhra Pradesh	518502	Bandana/Scarf/Handkerchief	No	Yes	Yes	No	1	No
Yes	20	Female	Uttar Pradesh	225001	Surgical Mask	Yes	Yes	Yes	No	1	No
Yes	19	Male	Uttar Pradesh	282007	Bandana/Scarf/Handkerchief	No	Yes	Yes	No	1	No
Yes	19	Female	Uttar Pradesh	226010	Cotton Mask	No	Yes	Yes	No	3	No
Yes	19	Female	Uttar Pradesh	250001	Surgical Mask	Yes	Yes	Yes	No	5	No
Yes	18	Male	Uttar Pradesh	283201	Cotton Mask	Yes	No	No	No	3	No
Yes	21	Male	Uttar Pradesh	281001	Surgical Mask	No	Yes	Yes	No	1	Yes	No	Yes	Yes
Yes	19	Female	Uttar Pradesh	221005	Surgical Mask	No	Yes	Yes	No	2	No
Yes	19	Male	Uttar Pradesh	226025	Cotton Mask	Yes	Yes	No	No	1	No
Yes	19	Male	Assam	781021	Cotton Mask	Yes	Yes	No	No	4	No
Yes	21	Male	Uttar Pradesh	233305	N95/N99 Respirators	Yes	Yes	Yes	No	1	No
Yes	20	Male	Uttar Pradesh	226002	Surgical Mask	No	Yes	No	No	1	No
Yes	21	Female	Jharkhand	827012	Surgical Mask	No	Yes	Yes	No	2	No
Yes	22	Female	Delhi(National Capital Territory)	110015	No, I don't have access to any of the above.	No	Yes	Yes	No	4	No
Yes	20	Female	Uttar Pradesh	246746	Surgical Mask	Yes	Yes	No	No	1	No
Yes	19	Female	Uttar Pradesh	208017	N95/N99 Respirators	No	Yes	Yes	No	5	No
Yes	19	Female	Jharkhand	834009	Surgical Mask	No	Yes	Yes	No	4	No
Yes	22	Male	Delhi(National Capital Territory)	110046	N95/N99 Respirators	Yes	Yes	Yes	No	3	No
Yes	18	Male	Uttar Pradesh	211011	Surgical Mask	No	Yes	No	No	2	No
Yes	21	Male	Maharashtra	403022	Surgical Mask	No	Yes	Yes	No	2	No
Yes	19	Male	Maharashtra	421501	N95/N99 Respirators	No	Yes	Yes	No	3	No
Yes	21	Male	Uttar Pradesh	211001	Bandana/Scarf/Handkerchief	No	Yes	No	No	2	No
Yes	22	Male	Jharkhand	835103	Cotton Mask	Yes	Yes	Yes	No	1	No
Yes	20	Male	Meghalya	793001	Cotton Mask	No	Yes	Yes	No	4	No
Yes	20	Female	Jharkhand	829104	Cotton Mask	No	Yes	No	No	1	No
Yes	20	Male	Jharkhand	834005	Surgical Mask	No	Yes	Yes	No	4	No
Yes	20	Female	Jharkhand	831002	Cotton Mask	No	Yes	Yes	No	1	No
Yes	17	Male	Uttar Pradesh	201001	N95/N99 Respirators	Yes	Yes	Yes	No	2	No
Yes	21	Male	Uttar Pradesh	281403	Cotton Mask	No	Yes	No	No	5	No
Yes	21	Female	Uttar Pradesh	225001	Bandana/Scarf/Handkerchief	Yes	Yes	Yes	No	2	No
Yes	20	Male	Jharkhand	834009	Surgical Mask	Yes	Yes	No	No	7	No
Yes	22	Male	Uttar Pradesh	228001	Surgical Mask	Yes	Yes	Yes	No	3	No
Yes	20	Male	Haryana	123401	N95/N99 Respirators	Yes	Yes	Yes	No	2	No
Yes	19	Male	West Bengal	700107	N95/N99 Respirators	No	Yes	Yes	No	3	No
Yes	19	Female	Uttar Pradesh	208005	Bandana/Scarf/Handkerchief	No	Yes	Yes	No	1	No
Yes	19	Male	West Bengal	723212	Bandana/Scarf/Handkerchief	No	Yes	Yes	No	2	No
Yes	18	Male	West Bengal	735122	Bandana/Scarf/Handkerchief	No	Yes	Yes	No	3	No
Yes	21	Female	Uttar Pradesh	210206	Surgical Mask	Yes	Yes	Yes	Yes	3	No
Yes	18	Male	West Bengal	736146	No, I don't have access to any of the above.	No	Yes	No	No	4	No
Yes	18	Female	West Bengal	711327	N95/N99 Respirators	Yes	Yes	Yes	No	4	No
Yes	22	Female	Madhya Pradesh	462047	Surgical Mask	Yes	Yes	No	No	5	No
Yes	19	Male	Bihar	800001	Cotton Mask	Yes	Yes	Yes	No	1	No
Yes	19	Male	West Bengal	712121	N95/N99 Respirators	Yes	Yes	Yes	No	3	No
Yes	26	Male	Punjab	152002	Surgical Mask	Yes	Yes	Yes	No	1	No
Yes	19	Male	Uttar Pradesh	241404	N95/N99 Respirators	Yes	Yes	No	No	3	No
Yes	26	Male	Madhya Pradesh	450001	Surgical Mask	Yes	Yes	Yes	No	4	No
Yes	47	Female	Uttar Pradesh	222145	Cotton Mask	Yes	Yes	Yes	No	1	No
Yes	19	Male	Uttar Pradesh	202421	Surgical Mask	Yes	Yes	Yes	No	3	No
Yes	19	Male	Uttar Pradesh	273014	No, I don't have access to any of the above.	No	Yes	No	No	3	No
Yes	18	Female	Punjab	148020	Surgical Mask	Yes	Yes	Yes	No	7	No
Yes	28	Male	Madhya Pradesh	488422	Bandana/Scarf/Handkerchief	No	Yes	No	No	2	No
Yes	20	Female	Uttar Pradesh	208011	Cotton Mask	Yes	Yes	Yes	No	1	Yes	Yes	Yes	Yes
Yes	17	Female	Bihar	854311	Surgical Mask	Yes	Yes	Yes	No	2	No
Yes	19	Female	Rajasthan	311001	No, I don't have access to any of the above.	No	Yes	Yes	No	4	No
Yes	20	Male	Haryana	121001	Surgical Mask	No	Yes	Yes	No	6	No
Yes	23	Female	Uttar Pradesh	284404	Surgical Mask	Yes	Yes	Yes	No	1	No
Yes	46	Female	Uttar Pradesh	226017	Surgical Mask	Yes	Yes	Yes	No	1	No
Yes	37	Female	Uttar Pradesh	262721	Surgical Mask	Yes	Yes	Yes	No	1	No
Yes	21	Male	Uttar Pradesh	271308	Surgical Mask	Yes	Yes	Yes	No	3	No
Yes	19	Female	Chandigarh	160003	Surgical Mask	Yes	Yes	Yes	No	3	No
Yes	18	Male	Uttar Pradesh	273155	N95/N99 Respirators	No	Yes	Yes	No	5	No
Yes	20	Female	Uttar Pradesh	206248	Cotton Mask	No	Yes	Yes	No	1	No
Yes	19	Male	Uttar Pradesh	283205	Surgical Mask	No	Yes	Yes	No	3	No
Yes	18	Male	Uttar Pradesh	245201	N95/N99 Respirators	No	Yes	No	No	3	No
Yes	21	Male	Uttar Pradesh	206301	Bandana/Scarf/Handkerchief	No	Yes	Yes	No	1	No
Yes	20	Male	Uttar Pradesh	274501	Surgical Mask	Yes	Yes	No	No	5	No
Yes	20	Male	Uttar Pradesh	243636	Cotton Mask	Yes	Yes	Yes	No	2	No
Yes	29	Female	Delhi(National Capital Territory)	110020	Surgical Mask	Yes	Yes	No	No	4	No
Yes	23	Male	Uttar Pradesh	243621	Bandana/Scarf/Handkerchief	Yes	Yes	Yes	No	5	No
Yes	51	Female	Uttarakhand	248007	Surgical Mask	No	Yes	No	No	2	No
Yes	22	Male	Uttar Pradesh	281409	N95/N99 Respirators	Yes	Yes	No	No	1	No
Yes	19	Female	Uttar Pradesh	281303	Cotton Mask	No	Yes	Yes	No	4	No
Yes	19	Male	Uttar Pradesh	281004	N95/N99 Respirators	Yes	Yes	Yes	No	5	Yes	No	No	Some are Some are Not
Yes	23	Male	Bihar	824203	Bandana/Scarf/Handkerchief	Yes	Yes	Yes	No	1	No
Yes	20	Male	Bihar	854308	Surgical Mask	Yes	Yes	Yes	No	1	No
Yes	20	Female	Uttar Pradesh	205267	Surgical Mask	Yes	Yes	No	No	4	No
Yes	22	Female	Uttar Pradesh	281501	Cotton Mask	Yes	Yes	Yes	No	1	No
Yes	25	Male	Uttar Pradesh	224143	Cotton Mask	No	Yes	Yes	No	1	No
Yes	18	Female	Uttar Pradesh	209861	Bandana/Scarf/Handkerchief	No	Yes	Yes	No	3	No
Yes	21	Female	Uttar Pradesh	212635	Surgical Mask	Yes	Yes	No	No	1	No
Yes	42	Male	Uttar Pradesh	246726	Surgical Mask	No	Yes	Yes	No	2	No
Yes	21	Male	Uttar Pradesh	212105	Surgical Mask	Yes	Yes	Yes	No	1	No
Yes	18	Male	Uttar Pradesh	231220	No, I don't have access to any of the above.	No	Yes	No	No	3	No
Yes	23	Female	Jharkhand	827001	Bandana/Scarf/Handkerchief	Yes	Yes	No	No	1	No
Yes	19	Male	Maharashtra	414502	N95/N99 Respirators	No	Yes	Yes	No	2	No
Yes	20	Male	Jharkhand	828106	N95/N99 Respirators	Yes	Yes	Yes	No	1	No
Yes	20	Female	Jharkhand	834010	Bandana/Scarf/Handkerchief	Yes	Yes	No	No	3	No
Yes	20	Male	Uttar Pradesh	244103	N95/N99 Respirators	No	Yes	Yes	No	4	No
Yes	21	Female	Uttar Pradesh	244001	Cotton Mask	Yes	Yes	Yes	No	2	No
Yes	25	Male	Uttar Pradesh	251315	N95/N99 Respirators	No	Yes	Yes	No	4	No
Yes	22	Female	Uttar Pradesh	202389	N95/N99 Respirators	Yes	Yes	Yes	No	1	No
Yes	21	Female	Jharkhand	831008	Surgical Mask	No	Yes	No	No	4	No
Yes	19	Male	Jharkhand	829109	Surgical Mask	Yes	Yes	Yes	No	3	No
Yes	18	Male	Uttar Pradesh	285128	Bandana/Scarf/Handkerchief	Yes	Yes	Yes	No	5	No
Yes	20	Male	Jharkhand	831004	Cotton Mask	No	Yes	No	No	3	No
Yes	20	Male	Rajasthan	333001	Surgical Mask	Yes	Yes	Yes	No	3	No
Yes	20	Female	Uttar Pradesh	244921	N95/N99 Respirators	Yes	Yes	Yes	No	3	No
Yes	19	Male	Jharkhand	833213	Cotton Mask	No	Yes	Yes	No	1	No
Yes	23	Male	Jharkhand	835301	Cotton Mask	No	Yes	No	No	3	No
Yes	22	Male	Bihar	803101	Bandana/Scarf/Handkerchief	Yes	Yes	Yes	No	5	No
Yes	18	Female	Gujarat	380001	Cotton Mask	No	Yes	Yes	No	1	No
Yes	19	Male	Jharkhand	829206	Surgical Mask	No	Yes	Yes	No	2	No
Yes	18	Male	Uttar Pradesh	230404	Surgical Mask	Yes	Yes	Yes	Yes	1	Yes	No	No	Some are Some are Not
Yes	20	Male	Bihar	811307	Surgical Mask	Yes	Yes	No	No	5	No
Yes	18	Male	Rajasthan	305001	Surgical Mask	Yes	Yes	Yes	No	2	Yes	Yes	Yes	No
Yes	19	Female	Uttar Pradesh	271312	N95/N99 Respirators	Yes	Yes	No	No	1	No
Yes	19	Male	Uttar Pradesh	233308	Surgical Mask	Yes	Yes	Yes	No	3	No
Yes	23	Male	Uttar Pradesh	283205	Bandana/Scarf/Handkerchief	Yes	Yes	Yes	No	2	No
Yes	20	Female	Uttar Pradesh	206120	Bandana/Scarf/Handkerchief	No	Yes	Yes	No	4	No
Yes	18	Male	Uttar Pradesh	207245	Surgical Mask	Yes	Yes	No	No	2	No
Yes	21	Female	Uttar Pradesh	243002	Surgical Mask	Yes	Yes	Yes	No	2	No
Yes	18	Male	Andhra Pradesh	517415	Surgical Mask	No	Yes	Yes	No	1	No
Yes	20	Male	Jharkhand	829132	Cotton Mask	No	Yes	No	No	2	No
Yes	22	Male	Uttar Pradesh	284122	Surgical Mask	Yes	Yes	Yes	No	10	No
Yes	20	Female	Uttar Pradesh	221503	Surgical Mask	Yes	Yes	Yes	No	2	No
Yes	20	Female	Uttar Pradesh	223221	Surgical Mask	Yes	Yes	Yes	No	1	No
Yes	21	Male	Andhra Pradesh	500009	Bandana/Scarf/Handkerchief	Yes	Yes	Yes	No	1	No
Yes	22	Male	Uttar Pradesh	232104	Surgical Mask	No	Yes	No	No	4	No
Yes	19	Male	Uttar Pradesh	271202	Surgical Mask	Yes	Yes	Yes	No	1	No
Yes	19	Male	Jharkhand	815314	Bandana/Scarf/Handkerchief	No	Yes	Yes	No	5	No
Yes	19	Female	Jharkhand	816107	Cotton Mask	Yes	Yes	Yes	No	5	No
Yes	56	Male	West Bengal	713304	N95/N99 Respirators	Yes	Yes	Yes	No	3	No
Yes	24	Male	Uttar Pradesh	226005	Cotton Mask	Yes	Yes	No	No	2	No
Yes	18	Male	Andhra Pradesh	518001	Bandana/Scarf/Handkerchief	No	No	Yes	No	4	No
Yes	21	Female	Uttar Pradesh	226008	Surgical Mask	Yes	Yes	Yes	No	1	No
Yes	20	Male	Uttar Pradesh	282001	Surgical Mask	Yes	Yes	Yes	No	5	No
Yes	19	Female	Delhi(National Capital Territory)	110032	N95/N99 Respirators	Yes	Yes	Yes	No	3	No
Yes	21	Male	Uttar Pradesh	244410	Surgical Mask	No	Yes	Yes	No	4	No
Yes	19	Male	Delhi(National Capital Territory)	110085	N95/N99 Respirators	No	Yes	Yes	No	2	No
Yes	20	Female	Uttar Pradesh	250002	Surgical Mask	Yes	Yes	Yes	No	1	No
Yes	20	Male	Uttar Pradesh	283203	N95/N99 Respirators	No	Yes	Yes	No	3	No
Yes	20	Male	Jharkhand	827001	N95/N99 Respirators	Yes	Yes	Yes	No	1	No
Yes	24	Male	Bihar	848132	Surgical Mask	No	Yes	Yes	No	1	No
Yes	20	Male	Bihar	800003	Bandana/Scarf/Handkerchief	No	Yes	Yes	Yes	5	No
Yes	19	Male	Delhi(National Capital Territory)	201301	Bandana/Scarf/Handkerchief	Yes	Yes	Yes	No	3	No
Yes	22	Male	Bihar	852161	Cotton Mask	No	No	No	No	1	No
Yes	19	Male	Uttarakhand	244713	Surgical Mask	No	Yes	Yes	No	1	No
Yes	21	Male	Uttar Pradesh	226012	N95/N99 Respirators	Yes	Yes	Yes	No	2	No
Yes	19	Female	Jharkhand	815301	Cotton Mask	Yes	Yes	Yes	No	2	No
Yes	22	Male	Uttar Pradesh	224161	Bandana/Scarf/Handkerchief	No	Yes	Yes	No	4	No
Yes	20	Female	Bihar	823003	Surgical Mask	Yes	Yes	Yes	No	1	No
Yes	18	Male	Uttar Pradesh	282005	N95/N99 Respirators	No	Yes	Yes	No	1	No
Yes	19	Female	Uttar Pradesh	283203	Surgical Mask	Yes	Yes	Yes	No	1	No
Yes	20	Female	Uttar Pradesh	225001	Bandana/Scarf/Handkerchief	No	Yes	Yes	No	1	No
Yes	19	Female	Rajasthan	302004	Surgical Mask	No	Yes	Yes	No	2	No
Yes	17	Male	Uttar Pradesh	201002	Surgical Mask	No	Yes	Yes	No	5	No
Yes	18	Male	Uttar Pradesh	282002	Bandana/Scarf/Handkerchief	Yes	Yes	Yes	No	2	No
Yes	19	Male	Gujarat	390006	Surgical Mask	Yes	Yes	Yes	No	2	No
Yes	20	Male	Rajasthan	335063	N95/N99 Respirators	Yes	Yes	Yes	No	1	No
Yes	19	Female	Bihar	801507	Surgical Mask	No	Yes	No	No	3	No
Yes	19	Male	Maharashtra	400701	Surgical Mask	No	Yes	Yes	No	10	No
Yes	20	Male	Kerala	670141	Surgical Mask	Yes	Yes	Yes	No	1	No
Yes	20	Female	West Bengal	700064	Surgical Mask	Yes	Yes	Yes	No	1	No
Yes	21	Male	Bihar	854115	Bandana/Scarf/Handkerchief	No	Yes	Yes	No	1	No
Yes	25	Male	Uttar Pradesh	282006	Surgical Mask	No	Yes	Yes	No	1	No
Yes	19	Female	Uttar Pradesh	226010	Bandana/Scarf/Handkerchief	Yes	Yes	No	No	1	No
Yes	20	Male	Haryana	123023	Surgical Mask	Yes	Yes	Yes	No	1	Yes	Yes	No	Yes
Yes	20	Female	Uttar Pradesh	282006	Surgical Mask	No	Yes	Yes	No	3	No
Yes	22	Male	Uttar Pradesh	201009	N95/N99 Respirators	Yes	Yes	Yes	No	6	No
Yes	20	Male	Jharkhand	827004	Bandana/Scarf/Handkerchief	No	Yes	Yes	No	1	No
Yes	22	Male	Rajasthan	302021	Surgical Mask	No	Yes	Yes	No	2	No
Yes	28	Male	Maharashtra	410210	Bandana/Scarf/Handkerchief	No	Yes	Yes	No	1	No
Yes	22	Female	Delhi(National Capital Territory)	110096	N95/N99 Respirators	Yes	Yes	Yes	No	8	No
Yes	23	Female	Uttar Pradesh	201001	N95/N99 Respirators	No	Yes	No	Yes	5	No
Yes	14	Female	Uttar Pradesh	201301	N95/N99 Respirators	Yes	Yes	Yes	No	3	No
Yes	20	Male	Bihar	801507	Surgical Mask	No	Yes	No	No	5	No
Yes	22	Male	Uttar Pradesh	277001	Surgical Mask	No	Yes	No	Yes	1	No
Yes	20	Male	Bihar	848506	No, I don't have access to any of the above.	No	Yes	No	No	3	No
No
Yes	18	Male	Uttar Pradesh	282004	Surgical Mask	Yes	Yes	Yes	No	3	No
Yes	18	Male	Delhi(National Capital Territory)	110027	N95/N99 Respirators	Yes	Yes	Yes	No	3	No
Yes	22	Male	Uttar Pradesh	201204	Surgical Mask	Yes	Yes	Yes	No	3	No
Yes	19	Female	Uttar Pradesh	282005	N95/N99 Respirators	Yes	Yes	Yes	No	1	No
Yes	20	Male	Uttar Pradesh	210301	Surgical Mask	No	Yes	No	No	5	No
Yes	20	Female	Uttar Pradesh	208008	Surgical Mask	Yes	Yes	No	No	2	No
Yes	27	Female	Uttar Pradesh	202001	Surgical Mask	Yes	Yes	Yes	No	3	No
Yes	20	Female	Uttar Pradesh	250004	Surgical Mask	Yes	Yes	Yes	No	2	No
Yes	20	Female	Uttar Pradesh	208013	Bandana/Scarf/Handkerchief	Yes	Yes	Yes	No	5	No
Yes	20	Male	Uttar Pradesh	262001	Surgical Mask	No	Yes	Yes	No	2	Yes	No	No	Yes
Yes	20	Male	Uttar Pradesh	275304	Cotton Mask	No	No	Yes	No	1	No
Yes	21	Female	Uttar Pradesh	250001	Cotton Mask	No	Yes	Yes	No	1	No
Yes	20	Male	Odisha	769003	Surgical Mask	No	Yes	Yes	No	1	No
Yes	19	Male	Uttar Pradesh	282004	Surgical Mask	No	Yes	Yes	No	4	No
Yes	20	Male	Uttar Pradesh	276128	Bandana/Scarf/Handkerchief	Yes	Yes	Yes	No	3	No
Yes	21	Female	Uttar Pradesh	250002	Surgical Mask	Yes	Yes	Yes	No	3	No
Yes	19	Female	Uttar Pradesh	226010	Surgical Mask	No	Yes	Yes	No	3	No
Yes	18	Female	Uttar Pradesh	282005	N95/N99 Respirators	Yes	Yes	Yes	No	5	No
Yes	19	Male	Uttar Pradesh	226010	N95/N99 Respirators	No	Yes	Yes	No	3	No
Yes	21	Female	Jharkhand	831002	Surgical Mask	Yes	Yes	Yes	No	1	No
Yes	19	Male	Uttar Pradesh	282003	Surgical Mask	Yes	Yes	Yes	Yes	6	No
Yes	23	Male	Uttar Pradesh	207123	Surgical Mask	Yes	Yes	No	No	8	Yes	No	Yes	Yes
Yes	20	Female	Chhattisgarh	494001	N95/N99 Respirators	Yes	Yes	No	No	10	No
Yes	56	Male	West Bengal	713304	N95/N99 Respirators	Yes	Yes	Yes	No	3	No
Yes	21	Male	Arunachal Pradesh	791111	N95/N99 Respirators	No	Yes	Yes	No	1	No
Yes	25	Male	Gujarat	380008	Bandana/Scarf/Handkerchief	Yes	Yes	No	No	6	No
Yes	20	Female	Odisha	825102	Surgical Mask	Yes	Yes	Yes	No	5	No
Yes	21	Female	Uttar Pradesh	250002	N95/N99 Respirators	Yes	Yes	Yes	No	1	No
Yes	20	Male	Rajasthan	332001	Surgical Mask	Yes	Yes	Yes	No	1	No
Yes	20	Male	Uttar Pradesh	282005	Bandana/Scarf/Handkerchief	No	Yes	No	No	8	No
Yes	25	Male	Uttar Pradesh	282002	Surgical Mask	No	Yes	No	No	4	No
Yes	22	Female	Chhattisgarh	494001	Surgical Mask	Yes	Yes	Yes	No	4	Yes	No	No	Yes
Yes	21	Male	Uttar Pradesh	228121	N95/N99 Respirators	Yes	Yes	Yes	No	1	No
Yes	19	Female	Uttar Pradesh	221001	Surgical Mask	Yes	Yes	Yes	No	3	No
Yes	20	Female	Jharkhand	831012	No, I don't have access to any of the above.	Yes	Yes	Yes	No	2	No
Yes	21	Male	Uttar Pradesh	276128	Surgical Mask	No	Yes	Yes	No	1	No
Yes	20	Male	Uttar Pradesh	276128	Bandana/Scarf/Handkerchief	Yes	Yes	Yes	No	3	No
Yes	21	Male	Uttar Pradesh	241008	Surgical Mask	No	Yes	No	No	1	No
Yes	19	Male	Uttar Pradesh	282004	N95/N99 Respirators	No	Yes	Yes	No	1	No
Yes	24	Male	Uttar Pradesh	201301	N95/N99 Respirators	No	Yes	Yes	No	6	No
Yes	21	Male	Uttar Pradesh	282007	Cotton Mask	No	Yes	No	No	1	No
Yes	13	Female	Uttar Pradesh	282004	Surgical Mask	No	Yes	No	No	1	No
Yes	18	Male	Uttar Pradesh	205001	No, I don't have access to any of the above.	No	Yes	Yes	No	1	No
Yes	19	Female	Uttar Pradesh	282002	N95/N99 Respirators	Yes	Yes	Yes	No	3	No
Yes	18	Female	Maharashtra	400101	Surgical Mask	No	Yes	Yes	No	7	No
Yes	19	Male	Uttar Pradesh	274201	Bandana/Scarf/Handkerchief	No	Yes	Yes	No	5	No
Yes	18	Male	Uttar Pradesh	274001	Cotton Mask	No	Yes	Yes	No	1	No
Yes	29	Male	Uttar Pradesh	201301	N95/N99 Respirators	Yes	Yes	Yes	No	8	No
Yes	44	Female	Uttar Pradesh	211019	Surgical Mask	Yes	Yes	Yes	No	1	No
Yes	19	Female	Delhi(National Capital Territory)	201301	N95/N99 Respirators	No	Yes	Yes	No	4	No
Yes	55	Male	Uttar Pradesh	202002	Cotton Mask	Yes	Yes	Yes	No	1	No
Yes	42	Female	Uttar Pradesh	282005	Bandana/Scarf/Handkerchief	No	Yes	No	No	1	No
No
Yes	20	Male	Uttar Pradesh	282003	Surgical Mask	No	Yes	No	No	7	No
Yes	52	Female	Uttar Pradesh	282002	Surgical Mask	Yes	Yes	Yes	No	1	No
Yes	22	Female	Uttar Pradesh	231501	Bandana/Scarf/Handkerchief	No	Yes	No	No	1	No
Yes	37	Female	Uttar Pradesh	201010	N95/N99 Respirators	Yes	Yes	Yes	No	5	No
No
Yes	16	Female	Uttar Pradesh	208010	Surgical Mask	No	Yes	Yes	No	4	No
Yes	21	Female	Uttar Pradesh	211001	Cotton Mask	Yes	Yes	Yes	No	3	No
Yes	19	Male	Uttar Pradesh	284128	Surgical Mask	Yes	Yes	Yes	No	2	No
Yes	20	Male	Uttar Pradesh	282002	Cotton Mask	Yes	Yes	Yes	No	6	No
Yes	20	Female	Uttar Pradesh	211001	Surgical Mask	Yes	Yes	Yes	No	6	No
Yes	18	Male	Jharkhand	831011	N95/N99 Respirators	Yes	Yes	Yes	No	1	No
Yes	20	Male	Karnataka	560038	Surgical Mask	Yes	Yes	No	No	4	No
Yes	20	Female	Madhya Pradesh	452001	Surgical Mask	No	Yes	No	No	3	No
Yes	17	Male	Uttar Pradesh	209861	Cotton Mask	No	Yes	No	No	1	No
Yes	19	Female	Maharashtra	444803	No, I don't have access to any of the above.	Yes	Yes	Yes	No	1	No
Yes	20	Male	Uttar Pradesh	282010	Surgical Mask	Yes	Yes	Yes	No	5	No
Yes	20	Male	Maharashtra	444601	Bandana/Scarf/Handkerchief	Yes	Yes	Yes	No	2	No
Yes	21	Male	Jharkhand	831011	N95/N99 Respirators	Yes	Yes	Yes	No	2	No
Yes	23	Female	Uttar Pradesh	282003	Cotton Mask	No	Yes	Yes	No	1	No
Yes	20	Male	Uttar Pradesh	282007	Surgical Mask	Yes	Yes	Yes	No	2	No
Yes	21	Male	Uttar Pradesh	282004	Surgical Mask	Yes	Yes	No	No	5	No
Yes	22	Female	Chhattisgarh	491226	Surgical Mask	Yes	Yes	No	No	3	No
Yes	18	Female	Uttar Pradesh	281001	Bandana/Scarf/Handkerchief	Yes	Yes	Yes	No	2	No
Yes	20	Male	Jharkhand	831011	N95/N99 Respirators	Yes	Yes	Yes	No	1	No
Yes	20	Female	Jharkhand	831009	N95/N99 Respirators	Yes	Yes	Yes	No	5	No
Yes	33	Male	Jharkhand	831001	N95/N99 Respirators	Yes	Yes	No	No	2	No
Yes	16	Male	Uttar Pradesh	208008	Cotton Mask	Yes	Yes	No	No	1	No
Yes	19	Male	Jharkhand	831001	Surgical Mask	Yes	Yes	No	No	1	No
Yes	18	Female	Karnataka	560048	N95/N99 Respirators	No	Yes	Yes	No	5	No
Yes	18	Male	Maharashtra	411014	Surgical Mask	Yes	No	Yes	No	5	No
Yes	19	Female	Maharashtra	412105	Cotton Mask	Yes	Yes	Yes	No	7	No
Yes	20	Male	Jharkhand	831013	Surgical Mask	Yes	Yes	Yes	No	1	No
Yes	20	Female	Uttar Pradesh	282001	Bandana/Scarf/Handkerchief	No	Yes	Yes	No	4	No
Yes	20	Male	Bihar	843113	No, I don't have access to any of the above.	No	Yes	No	No	10	No
Yes	20	Male	Jharkhand	831001	No, I don't have access to any of the above.	No	Yes	Yes	No	8	No
Yes	20	Male	Jharkhand	831013	N95/N99 Respirators	No	Yes	Yes	No	2	No
Yes	20	Male	Uttar Pradesh	250003	Cotton Mask	No	Yes	No	No	1	No
Yes	19	Male	Uttar Pradesh	226022	Bandana/Scarf/Handkerchief	Yes	Yes	Yes	No	3	No
Yes	19	Male	West Bengal	734426	Surgical Mask	Yes	Yes	Yes	No	2	No
Yes	19	Female	West Bengal	722183	Bandana/Scarf/Handkerchief	No	Yes	Yes	No	5	No
Yes	21	Female	Goa	403716	Cotton Mask	No	Yes	No	No	1	No
Yes	29	Male	Maharashtra	401107	Surgical Mask	Yes	Yes	Yes	No	1	No
Yes	18	Male	Uttar Pradesh	282001	Surgical Mask	No	Yes	Yes	No	6	No
Yes	19	Male	Uttar Pradesh	241001	Surgical Mask	Yes	Yes	Yes	No	3	No
Yes	19	Female	Maharashtra	412105	Cotton Mask	No	Yes	Yes	No	3	No
Yes	20	Female	Uttar Pradesh	282001	Surgical Mask	Yes	Yes	No	No	5	No
Yes	16	Male	Uttar Pradesh	226029	Cotton Mask	Yes	Yes	Yes	No	1	No
Yes	19	Male	Maharashtra	411032	Cotton Mask	Yes	Yes	Yes	Yes	5	No
Yes	20	Male	Tripura	799001	N95/N99 Respirators	Yes	Yes	Yes	No	1	No
Yes	18	Female	Uttar Pradesh	282006	Cotton Mask	No	Yes	Yes	No	1	No
Yes	19	Male	Uttar Pradesh	250004	Bandana/Scarf/Handkerchief	Yes	Yes	Yes	No	4	No
Yes	19	Female	Maharashtra	444803	Bandana/Scarf/Handkerchief	No	Yes	Yes	No	4	No
Yes	16	Male	Gujarat	382721	N95/N99 Respirators	Yes	Yes	Yes	No	1	No
Yes	21	Male	Jharkhand	831006	Surgical Mask	No	Yes	Yes	No	1	No
Yes	24	Male	Rajasthan	324009	Bandana/Scarf/Handkerchief	Yes	Yes	Yes	Yes	2	No
Yes	20	Male	Jharkhand	831009	Bandana/Scarf/Handkerchief	No	Yes	Yes	No	1	No
Yes	18	Female	Uttar Pradesh	226023	Cotton Mask	Yes	Yes	Yes	No	1	No
Yes	20	Male	Uttar Pradesh	226022	Bandana/Scarf/Handkerchief	No	No	No	Yes	4	No
Yes	39	Female	Uttar Pradesh	226018	Surgical Mask	Yes	Yes	Yes	No	4	No
Yes	17	Female	Jharkhand	834008	Cotton Mask	Yes	Yes	Yes	No	3	No
Yes	19	Female	Jharkhand	831012	Cotton Mask	Yes	Yes	No	No	1	No
Yes	21	Male	Uttar Pradesh	226010	Bandana/Scarf/Handkerchief	No	No	Yes	No	5	No
Yes	16	Female	Uttar Pradesh	211001	Cotton Mask	No	Yes	Yes	Yes	3	No
Yes	22	Male	Uttar Pradesh	250001	N95/N99 Respirators	Yes	Yes	Yes	No	1	Yes	Yes	Yes	No
Yes	19	Male	Uttar Pradesh	283202	Surgical Mask	Yes	Yes	Yes	No	1	No
Yes	20	Female	Bihar	812001	Cotton Mask	Yes	Yes	Yes	No	1	No
Yes	25	Male	Madhya Pradesh	452001	N95/N99 Respirators	Yes	Yes	Yes	No	1	No
Yes	24	Female	Delhi(National Capital Territory)	110092	N95/N99 Respirators	No	Yes	Yes	No	5	No
Yes	22	Male	Uttar Pradesh	211001	Cotton Mask	No	Yes	No	No	3	No
Yes	22	Male	Uttar Pradesh	273423	Surgical Mask	Yes	Yes	Yes	No	1	No
Yes	18	Female	Uttar Pradesh	226023	Bandana/Scarf/Handkerchief	No	Yes	No	No	7	No
Yes	19	Male	West Bengal	713304	Surgical Mask	No	Yes	Yes	No	3	No
Yes	20	Female	Chhattisgarh	495445	Bandana/Scarf/Handkerchief	Yes	Yes	Yes	No	2	No
Yes	20	Female	Chhattisgarh	490020	Cotton Mask	Yes	Yes	Yes	No	2	No
Yes	19	Female	Uttar Pradesh	250001	Bandana/Scarf/Handkerchief	No	Yes	Yes	No	2	No
Yes	20	Male	Delhi(National Capital Territory)	110024	N95/N99 Respirators	Yes	Yes	Yes	No	3	No
Yes	18	Female	Chhattisgarh	495220	Cotton Mask	Yes	Yes	Yes	No	3	No
Yes	21	Female	Uttar Pradesh	250004	Surgical Mask	Yes	Yes	Yes	No	4	No
Yes	52	Male	Uttar Pradesh	226025	Cotton Mask	No	Yes	Yes	No	1	No
Yes	21	Male	Uttar Pradesh	226010	N95/N99 Respirators	Yes	Yes	Yes	No	2	No
No
Yes	20	Male	Delhi(National Capital Territory)	110026	Cotton Mask	No	Yes	Yes	No	5	No
Yes	20	Male	Haryana	122001	Bandana/Scarf/Handkerchief	No	No	No	Yes	10	No
Yes	27	Male	Uttar Pradesh	204214	Bandana/Scarf/Handkerchief	No	Yes	No	No	2	No
Yes	18	Female	Chhattisgarh	490011	Cotton Mask	Yes	Yes	No	No	3	No
Yes	20	Male	Uttar Pradesh	250004	Surgical Mask	Yes	Yes	Yes	No	10	No
Yes	19	Male	Uttar Pradesh	250004	N95/N99 Respirators	Yes	Yes	Yes	No	1	No
Yes	17	Male	Uttar Pradesh	313005	N95/N99 Respirators	Yes	Yes	Yes	No	4	No
Yes	20	Male	Uttar Pradesh	282001	Bandana/Scarf/Handkerchief	No	Yes	Yes	No	1	No
Yes	19	Male	Uttar Pradesh	201002	N95/N99 Respirators	Yes	Yes	Yes	Yes	1	No
Yes	16	Female	Delhi(National Capital Territory)	110015	Bandana/Scarf/Handkerchief	Yes	Yes	Yes	No	1	No
Yes	16	Female	Uttar Pradesh	201002	Surgical Mask	Yes	Yes	No	No	3	No
Yes	20	Male	Uttar Pradesh	274001	Surgical Mask	No	Yes	No	No	3	No
Yes	18	Female	Chhattisgarh	496661	Surgical Mask	Yes	Yes	Yes	No	1	No
Yes	18	Male	Rajasthan	313001	Surgical Mask	No	Yes	Yes	No	3	No
Yes	20	Male	Uttar Pradesh	226022	N95/N99 Respirators	Yes	Yes	No	No	3	No
Yes	19	Female	Delhi(National Capital Territory)	110086	Surgical Mask	Yes	Yes	No	No	3	No
Yes	20	Female	Chhattisgarh	492001	Surgical Mask	Yes	Yes	Yes	No	1	No
Yes	20	Female	Chhattisgarh	492001	Surgical Mask	Yes	Yes	Yes	No	1	No
Yes	18	Female	Chhattisgarh	496661	Surgical Mask	Yes	Yes	Yes	No	1	No
Yes	46	Female	Jharkhand	831006	Bandana/Scarf/Handkerchief	No	Yes	Yes	No	1	No
Yes	55	Female	Uttar Pradesh	201301	N95/N99 Respirators	Yes	Yes	Yes	No	5	No
Yes	20	Female	Uttar Pradesh	282001	Surgical Mask	Yes	Yes	Yes	No	10	No
Yes	20	Male	Uttar Pradesh	282001	N95/N99 Respirators	Yes	Yes	Yes	Yes	1	No
Yes	33	Male	Uttar Pradesh	208020	Bandana/Scarf/Handkerchief	No	Yes	Yes	No	1	No
No
Yes	17	Female	Uttar Pradesh	282004	Surgical Mask	Yes	Yes	Yes	No	4	No
Yes	16	Female	Uttar Pradesh	211014	Surgical Mask	Yes	Yes	Yes	No	1	No
Yes	19	Female	Uttar Pradesh	243006	Bandana/Scarf/Handkerchief	Yes	Yes	Yes	No	3	No
Yes	19	Male	Uttar Pradesh	282007	Surgical Mask	Yes	Yes	Yes	No	1	No
Yes	35	Male	Karnataka	560048	N95/N99 Respirators	No	Yes	Yes	No	2	No
Yes	20	Female	Uttar Pradesh	226012	Cotton Mask	Yes	Yes	Yes	No	1	No
Yes	28	Female	Karnataka	560095	N95/N99 Respirators	No	Yes	Yes	Yes	7	No
Yes	35	Male	Delhi(National Capital Territory)	110096	N95/N99 Respirators	Yes	Yes	No	No	2	No
Yes	19	Male	Uttar Pradesh	282003	Cotton Mask	No	Yes	Yes	No	1	No
Yes	20	Male	Uttar Pradesh	282007	N95/N99 Respirators	No	No	Yes	No	8	No
Yes	20	Female	Uttar Pradesh	208027	Surgical Mask	No	Yes	Yes	No	5	No
Yes	19	Male	Uttar Pradesh	211019	Cotton Mask	Yes	Yes	No	No	1	No
Yes	20	Male	Uttar Pradesh	226021	Cotton Mask	No	Yes	Yes	No	3	No
Yes	21	Female	Uttar Pradesh	282005	No, I don't have access to any of the above.	Yes	Yes	Yes	No	1	No
Yes	30	Male	Karnataka	560043	Bandana/Scarf/Handkerchief	No	Yes	No	No	5	No
No
Yes	23	Male	Uttar Pradesh	282006	Bandana/Scarf/Handkerchief	No	Yes	Yes	No	1	No
Yes	19	Male	Uttar Pradesh	208025	No, I don't have access to any of the above.	No	Yes	No	No	3	No
Yes	20	Male	Uttar Pradesh	208011	N95/N99 Respirators	No	Yes	No	No	1	No
Yes	19	Male	Goa	403507	Surgical Mask	Yes	Yes	Yes	No	3	No
Yes	20	Female	Uttar Pradesh	282001	Bandana/Scarf/Handkerchief	No	Yes	Yes	No	4	No
Yes	20	Male	Uttar Pradesh	231213	Cotton Mask	No	Yes	Yes	No	1	No
Yes	20	Male	Uttar Pradesh	282006	Bandana/Scarf/Handkerchief	Yes	Yes	No	No	3	No
Yes	34	Male	Telangana	500091	Surgical Mask	Yes	Yes	No	No	3	No
Yes	20	Female	Uttar Pradesh	226003	Cotton Mask	Yes	Yes	Yes	No	2	No
Yes	16	Male	Jharkhand	826001	No, I don't have access to any of the above.	No	Yes	Yes	No	1	No
Yes	18	Male	Uttar Pradesh	282007	Surgical Mask	Yes	Yes	Yes	No	3	No
Yes	20	Male	Uttar Pradesh	282006	Bandana/Scarf/Handkerchief	Yes	Yes	Yes	No	4	No
Yes	20	Male	Uttar Pradesh	226020	Surgical Mask	Yes	Yes	Yes	No	3	No
Yes	21	Male	Uttar Pradesh	250110	Surgical Mask	Yes	Yes	Yes	No	3	No
Yes	20	Female	Uttar Pradesh	203205	Surgical Mask	Yes	Yes	No	No	1	No
Yes	19	Male	Uttar Pradesh	231222	Bandana/Scarf/Handkerchief	Yes	Yes	Yes	No	2	No
Yes	19	Male	Haryana	132103	Surgical Mask	Yes	Yes	No	No	2	Yes	Yes	Yes	Some are Some are Not
Yes	22	Male	Uttar Pradesh	282006	Surgical Mask	Yes	Yes	Yes	No	1	No
Yes	20	Male	Uttar Pradesh	282001	Surgical Mask	No	Yes	Yes	No	5	No
Yes	22	Male	Uttar Pradesh	282001	Bandana/Scarf/Handkerchief	Yes	Yes	Yes	No	1	No
Yes	21	Female	Uttar Pradesh	226012	Bandana/Scarf/Handkerchief	No	Yes	Yes	No	2	No
Yes	20	Female	Uttar Pradesh	201001	Cotton Mask	Yes	Yes	Yes	No	4	No
Yes	21	Male	Maharashtra	411028	Surgical Mask	No	Yes	No	No	2	No
Yes	20	Female	Uttar Pradesh	226010	Cotton Mask	Yes	Yes	Yes	No	1	No
Yes	20	Male	Bihar	811201	Bandana/Scarf/Handkerchief	No	Yes	Yes	No	1	No
Yes	21	Male	Uttar Pradesh	226012	Bandana/Scarf/Handkerchief	No	Yes	No	No	3	No
Yes	19	Female	Uttar Pradesh	282001	N95/N99 Respirators	No	Yes	Yes	No	8	No
Yes	30	Male	Odisha	753001	Bandana/Scarf/Handkerchief	Yes	Yes	No	No	1	No
Yes	16	Female	Himachal Pradesh	173001	N95/N99 Respirators	Yes	Yes	Yes	No	1	No
Yes	20	Female	Maharashtra	442907	Bandana/Scarf/Handkerchief	No	Yes	Yes	No	1	No
Yes	22	Female	Uttar Pradesh	282001	N95/N99 Respirators	Yes	Yes	Yes	No	4	No
Yes	19	Male	Uttar Pradesh	201301	N95/N99 Respirators	No	Yes	No	No	5	No
Yes	20	Female	Uttar Pradesh	226022	Surgical Mask	Yes	Yes	Yes	No	5	No
Yes	21	Female	Uttar Pradesh	226012	Surgical Mask	No	Yes	No	No	3	No
Yes	16	Female	Uttar Pradesh	250001	Cotton Mask	No	Yes	Yes	No	2	No
Yes	20	Female	Uttar Pradesh	229201	Bandana/Scarf/Handkerchief	Yes	Yes	No	No	4	No
Yes	18	Female	West Bengal	711227	Surgical Mask	Yes	Yes	Yes	No	2	No
Yes	19	Male	Uttar Pradesh	281401	Surgical Mask	Yes	Yes	Yes	No	1	No
Yes	18	Male	Uttar Pradesh	282001	N95/N99 Respirators	No	Yes	Yes	No	6	No
Yes	19	Male	Uttar Pradesh	281401	Surgical Mask	Yes	Yes	Yes	No	1	No
Yes	18	Male	Uttar Pradesh	283202	Surgical Mask	No	Yes	No	No	4	No
Yes	25	Female	Uttar Pradesh	282010	Surgical Mask	No	Yes	Yes	No	2	No
Yes	21	Male	Uttar Pradesh	273017	Surgical Mask	Yes	Yes	Yes	No	3	No
Yes	19	Male	Himachal Pradesh	171225	Surgical Mask	No	Yes	No	No	2	No
Yes	19	Male	Delhi(National Capital Territory)	201012	Surgical Mask	Yes	Yes	Yes	No	6	No
Yes	20	Female	Delhi(National Capital Territory)	110053	Surgical Mask	Yes	Yes	Yes	No	1	Yes	Yes	Yes	Yes
Yes	19	Female	Himachal Pradesh	172026	Surgical Mask	Yes	Yes	Yes	No	2	No
No
Yes	34	Male	Delhi(National Capital Territory)	110048	N95/N99 Respirators	No	Yes	Yes	No	8	No
Yes	23	Male	Haryana	125055	Bandana/Scarf/Handkerchief	No	Yes	Yes	No	1	No
Yes	19	Female	Himachal Pradesh	176061	Surgical Mask	Yes	Yes	Yes	No	1	No
Yes	55	Male	Uttar Pradesh	243722	Surgical Mask	Yes	Yes	No	No	1	No
Yes	20	Male	Uttar Pradesh	221603	Cotton Mask	Yes	Yes	Yes	No	1	No
Yes	50	Female	Uttar Pradesh	24372	Surgical Mask	Yes	Yes	Yes	No	1	No
Yes	20	Female	Delhi(National Capital Territory)	110022	Cotton Mask	Yes	Yes	Yes	No	3	No
Yes	19	Male	Uttar Pradesh	201303	Surgical Mask	Yes	Yes	Yes	Yes	2	No
Yes	24	Female	Chandigarh	160036	Surgical Mask	Yes	Yes	Yes	No	2	No
No
Yes	20	Female	Uttar Pradesh	221005	Cotton Mask	No	Yes	Yes	No	4	No
Yes	19	Male	Uttar Pradesh	243001	No, I don't have access to any of the above.	No	Yes	No	No	1	No
Yes	21	Male	Uttar Pradesh	226012	Bandana/Scarf/Handkerchief	No	Yes	No	No	2	No
Yes	18	Male	Uttar Pradesh	201304	Surgical Mask	No	Yes	No	No	1	No
Yes	19	Female	Uttar Pradesh	221108	Surgical Mask	No	Yes	Yes	No	2	No
Yes	19	Female	Uttar Pradesh	282007	N95/N99 Respirators	Yes	Yes	Yes	No	5	No
Yes	20	Female	Uttar Pradesh	282001	Cotton Mask	Yes	Yes	Yes	No	4	No
Yes	19	Female	Uttar Pradesh	226022	Cotton Mask	Yes	Yes	No	No	6	No
Yes	48	Male	Uttar Pradesh	283204	No, I don't have access to any of the above.	No	Yes	Yes	No	7	No
Yes	20	Female	Uttar Pradesh	246746	Surgical Mask	Yes	Yes	No	No	1	No
Yes	30	Male	Bihar	845456	Bandana/Scarf/Handkerchief	No	Yes	No	No	5	No
Yes	20	Male	Jharkhand	831011	N95/N99 Respirators	No	Yes	Yes	No	1	No
Yes	19	Female	Uttar Pradesh	202625	Cotton Mask	No	Yes	Yes	No	4	No
Yes	20	Male	Haryana	121002	Cotton Mask	No	Yes	Yes	No	5	No
Yes	19	Female	Uttar Pradesh	208014	N95/N99 Respirators	Yes	Yes	No	No	1	No
Yes	22	Female	Delhi(National Capital Territory)	110092	Surgical Mask	Yes	Yes	Yes	No	3	No
Yes	19	Male	Delhi(National Capital Territory)	110029	N95/N99 Respirators	Yes	Yes	Yes	No	9	No
Yes	20	Male	Uttar Pradesh	247776	Bandana/Scarf/Handkerchief	Yes	Yes	Yes	No	5	No
Yes	19	Female	Haryana	123029	N95/N99 Respirators	No	Yes	No	No	1	No
Yes	19	Female	Rajasthan	325220	N95/N99 Respirators	No	Yes	No	No	1	No
Yes	21	Male	Uttar Pradesh	272194	N95/N99 Respirators	Yes	Yes	No	No	1	No
Yes	21	Male	Uttar Pradesh	205262	Bandana/Scarf/Handkerchief	No	No	Yes	No	1	No
Yes	20	Male	Rajasthan	303803	Bandana/Scarf/Handkerchief	No	Yes	No	No	2	No
Yes	20	Male	Maharashtra	401105	Cotton Mask	Yes	Yes	Yes	No	2	No
Yes	43	Female	Maharashtra	400008	Surgical Mask	Yes	Yes	No	No	5	No
Yes	18	Female	Madhya Pradesh	481335	Surgical Mask	No	Yes	Yes	No	5	No
Yes	38	Male	Uttar Pradesh	202001	N95/N99 Respirators	Yes	Yes	Yes	No	3	Yes	Yes	Yes	Yes
Yes	27	Female	Maharashtra	411057	N95/N99 Respirators	No	Yes	Yes	No	6	No
Yes	19	Male	Odisha	761055	Cotton Mask	No	No	Yes	No	1	No
Yes	20	Male	Maharashtra	441224	Bandana/Scarf/Handkerchief	Yes	Yes	Yes	No	1	No
Yes	19	Male	Uttarakhand	263139	Surgical Mask	Yes	Yes	Yes	No	3	No
Yes	20	Male	Maharashtra	401105	Surgical Mask	No	Yes	No	No	6	No
Yes	21	Male	Maharashtra	421301	Bandana/Scarf/Handkerchief	No	Yes	No	No	1	No
Yes	19	Male	Maharashtra	444906	Surgical Mask	No	Yes	Yes	No	2	No
Yes	19	Female	Chhattisgarh	492006	Bandana/Scarf/Handkerchief	No	Yes	No	No	1	No
Yes	20	Female	Bihar	801302	Surgical Mask	Yes	Yes	Yes	No	1	Yes	Yes	Yes	Some are Some are Not
Yes	25	Male	Rajasthan	332709	Bandana/Scarf/Handkerchief	Yes	Yes	No	No	10	No
Yes	21	Male	Uttar Pradesh	226003	Bandana/Scarf/Handkerchief	Yes	Yes	Yes	No	3	No
Yes	21	Male	Uttar Pradesh	204102	Cotton Mask	No	Yes	No	No	3	No
Yes	22	Female	Uttar Pradesh	212106	Cotton Mask	No	Yes	No	Yes	4	No
Yes	21	Male	Rajasthan	332718	Cotton Mask	No	Yes	Yes	No	1	No
Yes	45	Female	Uttarakhand	263139	Surgical Mask	No	Yes	Yes	No	1	No
Yes	20	Female	Uttar Pradesh	226002	N95/N99 Respirators	Yes	Yes	Yes	No	2	No
Yes	19	Female	Rajasthan	324005	Surgical Mask	Yes	Yes	Yes	No	3	No
Yes	20	Male	Uttar Pradesh	282007	Cotton Mask	Yes	Yes	No	No	3	No
Yes	19	Female	Haryana	132103	Cotton Mask	Yes	Yes	Yes	No	1	No
Yes	20	Male	Uttar Pradesh	211006	N95/N99 Respirators	Yes	Yes	Yes	No	1	No
Yes	21	Female	Uttar Pradesh	250001	Surgical Mask	Yes	Yes	Yes	Yes	2	No
Yes	20	Female	Delhi(National Capital Territory)	110086	N95/N99 Respirators	Yes	Yes	Yes	No	1	No
Yes	20	Female	Delhi(National Capital Territory)	201203	Surgical Mask	Yes	Yes	Yes	No	1	No
Yes	25	Female	Uttar Pradesh	226001	N95/N99 Respirators	Yes	Yes	Yes	Yes	9	Yes	Yes	Yes	Some are Some are Not
Yes	19	Male	Uttar Pradesh	282006	Bandana/Scarf/Handkerchief	No	Yes	No	No	2	No
Yes	19	Male	Uttar Pradesh	201002	N95/N99 Respirators	Yes	Yes	Yes	No	1	No
Yes	20	Male	Uttar Pradesh	282005	Surgical Mask	Yes	Yes	Yes	No	3	No
Yes	20	Male	Uttar Pradesh	247776	Surgical Mask	Yes	Yes	Yes	No	1	No
Yes	21	Female	Uttar Pradesh	211015	Bandana/Scarf/Handkerchief	No	Yes	Yes	No	1	No
Yes	20	Male	Uttar Pradesh	208012	Bandana/Scarf/Handkerchief	No	Yes	Yes	No	3	No
Yes	20	Male	Haryana	121102	Cotton Mask	No	Yes	Yes	No	2	No
Yes	17	Female	Uttar Pradesh	282006	Surgical Mask	Yes	Yes	No	No	1	No
Yes	18	Female	Rajasthan	328021	Surgical Mask	Yes	Yes	No	No	8	No
Yes	19	Female	Uttar Pradesh	244001	Surgical Mask	Yes	Yes	Yes	No	10	No
Yes	20	Female	Haryana	121004	Surgical Mask	Yes	Yes	No	No	4	No
Yes	19	Male	Uttar Pradesh	282005	Surgical Mask	No	Yes	Yes	No	2	No
Yes	20	Male	Uttar Pradesh	204212	Surgical Mask	Yes	Yes	Yes	No	1	No
Yes	18	Male	Uttar Pradesh	282005	N95/N99 Respirators	Yes	Yes	Yes	No	4	No
Yes	23	Female	Uttar Pradesh	242001	Surgical Mask	Yes	Yes	Yes	No	4	No
Yes	20	Female	Odisha	751009	N95/N99 Respirators	No	Yes	Yes	No	2	No
Yes	21	Male	Bihar	854301	N95/N99 Respirators	Yes	Yes	No	No	1	No
Yes	18	Female	Haryana	135001	Surgical Mask	No	Yes	Yes	No	1	No
Yes	19	Female	Delhi(National Capital Territory)	110031	No, I don't have access to any of the above.	No	No	Yes	No	6	No
Yes	48	Male	Delhi(National Capital Territory)	110031	Bandana/Scarf/Handkerchief	No	No	Yes	Yes	7	No
Yes	19	Male	Odisha	767039	Bandana/Scarf/Handkerchief	No	Yes	Yes	No	2	No
Yes	19	Female	Uttar Pradesh	226003	Surgical Mask	Yes	Yes	No	No	7	No
Yes	17	Male	Uttar Pradesh	226003	Surgical Mask	No	Yes	No	No	2	No
Yes	21	Female	Uttar Pradesh	226021	Surgical Mask	No	Yes	Yes	No	2	No
Yes	18	Male	Uttar Pradesh	226003	Cotton Mask	Yes	Yes	Yes	No	1	No
Yes	21	Male	Delhi(National Capital Territory)	110044	Surgical Mask	Yes	Yes	Yes	No	3	No
Yes	21	Male	Delhi(National Capital Territory)	110043	Surgical Mask	Yes	Yes	No	No	3	No
Yes	20	Male	Uttar Pradesh	281001	N95/N99 Respirators	Yes	Yes	Yes	No	2	No
Yes	20	Male	Madhya Pradesh	470118	Bandana/Scarf/Handkerchief	No	Yes	Yes	No	4	No
Yes	19	Male	Haryana	125005	Cotton Mask	Yes	Yes	Yes	No	1	No
Yes	21	Male	Madhya Pradesh	470339	Bandana/Scarf/Handkerchief	No	Yes	Yes	Yes	8	No
Yes	21	Male	Madhya Pradesh	470339	Bandana/Scarf/Handkerchief	No	Yes	Yes	Yes	8	No
Yes	20	Male	Delhi(National Capital Territory)	110009	N95/N99 Respirators	Yes	Yes	Yes	No	5	No
Yes	21	Male	Delhi(National Capital Territory)	110086	Cotton Mask	No	Yes	Yes	No	4	No
Yes	19	Male	Haryana	125055	Surgical Mask	No	Yes	No	No	3	No
Yes	20	Male	Delhi(National Capital Territory)	41	Bandana/Scarf/Handkerchief	No	Yes	Yes	No	2	No
Yes	20	Male	Uttar Pradesh	211002	Surgical Mask	No	Yes	Yes	No	2	No
Yes	20	Female	Uttar Pradesh	226012	Surgical Mask	Yes	Yes	Yes	No	1	No
Yes	20	Male	Madhya Pradesh	470125	Cotton Mask	No	Yes	Yes	No	1	No
Yes	20	Male	Madhya Pradesh	470117	Bandana/Scarf/Handkerchief	Yes	Yes	No	No	1	No
Yes	21	Male	Uttar Pradesh	221303	Surgical Mask	No	No	No	No	4	No
Yes	20	Female	Haryana	125001	Surgical Mask	Yes	Yes	Yes	Yes	3	No
Yes	21	Female	Maharashtra	400094	Cotton Mask	Yes	Yes	Yes	No	2	No
Yes	24	Male	Maharashtra	421306	Bandana/Scarf/Handkerchief	No	Yes	Yes	No	5	No
Yes	21	Female	Maharashtra	400706	Cotton Mask	Yes	Yes	Yes	No	6	No
Yes	20	Female	Maharashtra	400049	Cotton Mask	Yes	Yes	Yes	No	6	No
Yes	20	Male	Maharashtra	421301	N95/N99 Respirators	No	Yes	No	No	4	No
Yes	22	Male	Uttar Pradesh	272192	Cotton Mask	Yes	No	Yes	No	1	No
Yes	21	Female	Uttar Pradesh	250002	Surgical Mask	Yes	Yes	Yes	No	1	No
Yes	18	Female	Uttar Pradesh	210001	Surgical Mask	Yes	Yes	Yes	No	9	No
Yes	21	Female	Maharashtra	413005	Cotton Mask	Yes	Yes	Yes	No	4	No
Yes	19	Male	Uttar Pradesh	202002	Surgical Mask	No	Yes	Yes	No	1	No
Yes	20	Female	Maharashtra	431601	Cotton Mask	Yes	Yes	Yes	No	2	No
Yes	20	Male	Maharashtra	400607	N95/N99 Respirators	No	Yes	Yes	No	1	No
Yes	20	Female	Maharashtra	444803	Cotton Mask	Yes	Yes	Yes	No	3	No
Yes	20	Male	Maharashtra	400078	N95/N99 Respirators	Yes	Yes	Yes	No	4	No
Yes	21	Male	Maharashtra	400062	Surgical Mask	Yes	Yes	Yes	No	2	No
Yes	20	Male	Gujarat	390009	N95/N99 Respirators	Yes	Yes	Yes	Yes	2	No
Yes	62	Male	Uttar Pradesh	226011	Cotton Mask	Yes	Yes	Yes	No	6	Yes	Yes	Yes	Yes
Yes	48	Male	Uttar Pradesh	226018	Surgical Mask	No	Yes	No	No	4	No
Yes	45	Female	Uttar Pradesh	226018	Surgical Mask	No	Yes	No	No	3	No
Yes	35	Male	Uttar Pradesh	201307	N95/N99 Respirators	No	Yes	Yes	No	3	No
Yes	21	Female	Maharashtra	440022	Cotton Mask	Yes	Yes	Yes	No	3	No
Yes	18	Male	Uttar Pradesh	261001	Surgical Mask	No	Yes	Yes	No	2	No
Yes	18	Male	Uttar Pradesh	208002	N95/N99 Respirators	Yes	Yes	Yes	No	3	No
Yes	18	Male	Madhya Pradesh	480994	N95/N99 Respirators	Yes	Yes	No	No	2	No
Yes	19	Male	Uttar Pradesh	207123	N95/N99 Respirators	No	Yes	Yes	No	3	No
Yes	18	Female	Uttar Pradesh	250110	Bandana/Scarf/Handkerchief	No	Yes	Yes	No	1	No
Yes	19	Male	Uttar Pradesh	207123	N95/N99 Respirators	No	Yes	Yes	No	3	No
Yes	20	Male	Uttar Pradesh	208021	Bandana/Scarf/Handkerchief	No	Yes	Yes	No	1	No
Yes	19	Male	Uttar Pradesh	207123	N95/N99 Respirators	Yes	Yes	Yes	No	3	No
Yes	18	Male	Madhya Pradesh	451440	Bandana/Scarf/Handkerchief	No	Yes	Yes	No	7	No
Yes	19	Male	Uttar Pradesh	251001	N95/N99 Respirators	Yes	Yes	Yes	No	1	No
Yes	20	Male	Uttar Pradesh	203202	Surgical Mask	No	No	Yes	No	1	No
Yes	21	Male	Delhi(National Capital Territory)	122001	N95/N99 Respirators	Yes	Yes	Yes	No	3	No
Yes	18	Male	Madhya Pradesh	474002	Bandana/Scarf/Handkerchief	No	Yes	No	No	1	No
Yes	21	Male	Uttar Pradesh	201206	Surgical Mask	Yes	Yes	Yes	No	1	No
Yes	21	Male	Odisha	751012	Surgical Mask	No	Yes	Yes	No	3	No
Yes	20	Male	Uttar Pradesh	203207	Surgical Mask	No	Yes	Yes	No	5	No
Yes	23	Female	Uttar Pradesh	226002	Surgical Mask	Yes	Yes	Yes	No	6	No
Yes	23	Female	Uttar Pradesh	226002	Surgical Mask	Yes	Yes	Yes	No	6	No
Yes	18	Male	Uttar Pradesh	208002	N95/N99 Respirators	Yes	Yes	Yes	No	3	No
Yes	21	Male	Uttar Pradesh	201204	Surgical Mask	Yes	Yes	Yes	No	2	No
Yes	22	Male	Uttar Pradesh	210426	Surgical Mask	Yes	Yes	Yes	No	1	No
Yes	20	Male	Uttar Pradesh	203207	N95/N99 Respirators	Yes	Yes	Yes	No	1	Yes	No	Yes	Some are Some are Not
Yes	22	Male	Uttar Pradesh	203207	Surgical Mask	No	Yes	Yes	No	3	No
Yes	19	Female	Bihar	736133	Cotton Mask	No	No	Yes	No	1	No
Yes	21	Female	Uttar Pradesh	243122	N95/N99 Respirators	Yes	Yes	Yes	No	2	No
Yes	20	Male	Uttar Pradesh	242001	Cotton Mask	No	Yes	Yes	No	1	No
Yes	19	Male	Uttar Pradesh	271301	Cotton Mask	No	Yes	Yes	No	5	No
Yes	19	Male	Uttar Pradesh	262001	Cotton Mask	No	Yes	No	No	2	No
Yes	20	Female	Uttar Pradesh	243122	Bandana/Scarf/Handkerchief	No	Yes	Yes	No	4	No
Yes	21	Male	Uttar Pradesh	250001	Surgical Mask	No	Yes	Yes	No	10	Yes	No	Yes	Some are Some are Not
Yes	20	Female	Maharashtra	400092	Surgical Mask	Yes	Yes	Yes	No	7	No
Yes	19	Male	Uttar Pradesh	201002	N95/N99 Respirators	Yes	Yes	Yes	No	1	No
Yes	20	Female	Uttar Pradesh	201001	Cotton Mask	Yes	Yes	Yes	No	4	No
Yes	20	Female	Uttar Pradesh	282001	Surgical Mask	Yes	Yes	No	No	2	No
Yes	18	Male	Uttar Pradesh	246734	Cotton Mask	Yes	Yes	Yes	No	9	No
Yes	19	Male	Uttar Pradesh	262001	Bandana/Scarf/Handkerchief	No	Yes	No	No	1	No
Yes	20	Male	Karnataka	560109	N95/N99 Respirators	Yes	Yes	Yes	No	3	No
Yes	20	Female	Uttar Pradesh	284001	N95/N99 Respirators	Yes	Yes	Yes	No	2	No
Yes	23	Female	Uttar Pradesh	273012	N95/N99 Respirators	No	Yes	No	No	3	No
Yes	19	Male	Jammu and Kashmir	185131	No, I don't have access to any of the above.	No	Yes	Yes	No	1	No
Yes	19	Female	Delhi(National Capital Territory)	110051	Surgical Mask	No	Yes	No	No	6	No
Yes	19	Male	Uttar Pradesh	221403	Surgical Mask	Yes	Yes	Yes	No	5	No
Yes	14	Female	Uttar Pradesh	26005	Bandana/Scarf/Handkerchief	No	Yes	Yes	No	1	No
Yes	19	Male	Uttar Pradesh	231210	Bandana/Scarf/Handkerchief	No	Yes	Yes	No	1	No
Yes	19	Male	Uttar Pradesh	231210	Bandana/Scarf/Handkerchief	No	Yes	Yes	No	1	No
Yes	21	Female	Uttar Pradesh	208008	Cotton Mask	No	Yes	Yes	No	3	No
Yes	19	Male	Uttar Pradesh	452010	N95/N99 Respirators	Yes	Yes	Yes	No	5	No
Yes	19	Male	Uttar Pradesh	230001	N95/N99 Respirators	Yes	Yes	No	No	2	No
Yes	19	Male	Madhya Pradesh	485001	Surgical Mask	No	Yes	Yes	No	2	No
Yes	19	Female	Rajasthan	345001	Surgical Mask	No	Yes	No	No	3	No
Yes	14	Male	Uttar Pradesh	226002	Surgical Mask	No	Yes	Yes	No	1	No
Yes	20	Female	Uttar Pradesh	242001	Surgical Mask	No	Yes	Yes	No	3	No
Yes	20	Male	Uttar Pradesh	201306	N95/N99 Respirators	Yes	Yes	No	No	2	No
Yes	17	Male	Uttar Pradesh	250401	Bandana/Scarf/Handkerchief	Yes	Yes	Yes	No	2	No
Yes	42	Male	Uttar Pradesh	226014	Surgical Mask	No	Yes	No	No	1	No
Yes	19	Male	Uttar Pradesh	244901	Surgical Mask	Yes	Yes	No	No	2	No
Yes	21	Male	Uttar Pradesh	282009	Surgical Mask	No	Yes	No	No	8	No
Yes	20	Male	Uttar Pradesh	282009	Surgical Mask	No	Yes	No	Yes	1	No
Yes	22	Male	Uttar Pradesh	282009	Surgical Mask	Yes	Yes	Yes	No	3	No
Yes	21	Female	Uttar Pradesh	226003	Surgical Mask	Yes	Yes	Yes	No	3	No
Yes	20	Male	Uttar Pradesh	282009	N95/N99 Respirators	Yes	Yes	Yes	Yes	1	No
Yes	22	Male	Uttar Pradesh	282005	Bandana/Scarf/Handkerchief	Yes	Yes	No	No	1	Yes	No	No	No
Yes	19	Male	Jharkhand	831005	N95/N99 Respirators	Yes	Yes	Yes	No	3	No
Yes	19	Male	Jharkhand	829122	Cotton Mask	No	Yes	Yes	No	1	No
Yes	19	Female	Jharkhand	834001	Bandana/Scarf/Handkerchief	No	No	Yes	No	6	No
Yes	21	Male	Madhya Pradesh	482001	Surgical Mask	Yes	Yes	Yes	No	7	No
Yes	39	Male	Karnataka	560076	Surgical Mask	No	Yes	Yes	No	1	No
Yes	21	Male	Madhya Pradesh	482001	Cotton Mask	Yes	Yes	Yes	No	1	No
Yes	20	Male	Madhya Pradesh	482001	No, I don't have access to any of the above.	Yes	Yes	Yes	No	1	No
Yes	19	Female	Uttar Pradesh	282001	No, I don't have access to any of the above.	Yes	Yes	Yes	No	3	No
Yes	22	Male	Uttar Pradesh	282009	Surgical Mask	No	Yes	Yes	No	3	No
Yes	22	Male	Uttar Pradesh	282009	Surgical Mask	No	Yes	Yes	No	3	No
Yes	20	Male	Madhya Pradesh	482001	Cotton Mask	No	Yes	Yes	No	5	No
Yes	22	Female	Uttar Pradesh	226011	Cotton Mask	No	Yes	Yes	No	7	No
Yes	22	Male	Uttar Pradesh	201002	Bandana/Scarf/Handkerchief	No	Yes	Yes	No	3	No
Yes	22	Male	Uttar Pradesh	281001	Bandana/Scarf/Handkerchief	No	Yes	Yes	No	2	No
Yes	22	Male	Uttar Pradesh	226003	N95/N99 Respirators	Yes	Yes	Yes	No	4	No
Yes	20	Male	Chhattisgarh	497001	Cotton Mask	No	Yes	No	No	4	No
Yes	22	Female	Uttar Pradesh	272001	Cotton Mask	Yes	Yes	No	No	2	Yes	No	No	Some are Some are Not
Yes	21	Male	Uttar Pradesh	208002	Surgical Mask	Yes	Yes	No	No	9	No
Yes	20	Male	Madhya Pradesh	482001	Cotton Mask	Yes	Yes	Yes	No	5	No
Yes	22	Female	Uttar Pradesh	226003	Surgical Mask	Yes	Yes	Yes	No	7	No
Yes	22	Female	Uttar Pradesh	251001	Surgical Mask	Yes	Yes	Yes	No	3	Yes	No	No	Yes
Yes	22	Female	Uttar Pradesh	226010	N95/N99 Respirators	Yes	Yes	Yes	No	5	No
Yes	18	Female	Uttar Pradesh	201014	Surgical Mask	Yes	Yes	Yes	No	3	No
Yes	24	Male	Uttar Pradesh	221005	Bandana/Scarf/Handkerchief	Yes	Yes	Yes	No	5	No
Yes	20	Female	Bihar	801105	Surgical Mask	Yes	Yes	Yes	No	1	No
Yes	19	Male	Rajasthan	324002	Cotton Mask	Yes	Yes	Yes	No	5	No
Yes	18	Female	Rajasthan	322001	Surgical Mask	Yes	Yes	Yes	No	1	No
Yes	19	Female	Bihar	800001	Surgical Mask	No	Yes	Yes	No	1	No
Yes	21	Male	Maharashtra	421301	Bandana/Scarf/Handkerchief	Yes	Yes	Yes	No	1	No
Yes	20	Male	Tripura	799006	N95/N99 Respirators	Yes	Yes	Yes	No	1	No
Yes	19	Female	Bihar	852123	Surgical Mask	Yes	Yes	Yes	No	10	No
Yes	21	Female	Uttar Pradesh	250002	Bandana/Scarf/Handkerchief	No	Yes	Yes	No	1	No
Yes	18	Female	Odisha	754103	No, I don't have access to any of the above.	Yes	Yes	No	No	4	No
Yes	19	Male	Bihar	802162	Cotton Mask	Yes	Yes	No	No	1	No
Yes	19	Male	Bihar	824211	Cotton Mask	No	Yes	Yes	No	2	Yes	Yes	Yes	Yes
Yes	17	Female	Gujarat	396001	Bandana/Scarf/Handkerchief	No	Yes	No	No	7	No
Yes	20	Male	Uttar Pradesh	273001	N95/N99 Respirators	Yes	Yes	Yes	No	2	No
Yes	19	Male	Bihar	824101	Bandana/Scarf/Handkerchief	No	No	Yes	No	5	No
Yes	21	Male	Rajasthan	302017	Bandana/Scarf/Handkerchief	No	Yes	No	No	2	No
Yes	21	Male	Haryana	123001	Bandana/Scarf/Handkerchief	Yes	Yes	Yes	No	5	Yes	No	No	Yes
Yes	21	Male	Bihar	842001	Surgical Mask	No	Yes	No	Yes	1	No
Yes	20	Female	Jharkhand	831004	N95/N99 Respirators	No	No	No	No	3	No
Yes	18	Male	Uttar Pradesh	282007	N95/N99 Respirators	No	Yes	Yes	No	4	No
Yes	20	Male	Uttar Pradesh	282005	Surgical Mask	Yes	Yes	Yes	No	1	No
Yes	24	Male	Himachal Pradesh	175019	Surgical Mask	No	Yes	No	No	6	Yes	Yes	Yes	Yes
Yes	20	Male	Himachal Pradesh	160022	Surgical Mask	Yes	Yes	Yes	No	2	No
Yes	19	Female	Delhi(National Capital Territory)	110092	Surgical Mask	Yes	Yes	Yes	No	2	No
Yes	21	Female	Himachal Pradesh	176030	Surgical Mask	Yes	Yes	No	No	3	No
Yes	21	Male	Himachal Pradesh	176051	Bandana/Scarf/Handkerchief	Yes	Yes	Yes	No	2	No
Yes	24	Male	Uttar Pradesh	250002	Surgical Mask	Yes	Yes	No	No	6	No
Yes	21	Female	Himachal Pradesh	175023	Cotton Mask	No	Yes	Yes	No	5	No
Yes	25	Male	Himachal Pradesh	173318	Surgical Mask	No	Yes	No	No	2	No
Yes	24	Male	Himachal Pradesh	177105	Surgical Mask	No	Yes	Yes	No	4	No
Yes	19	Male	Himachal Pradesh	172026	Surgical Mask	Yes	Yes	Yes	No	2	No
Yes	19	Female	Himachal Pradesh	174303	Surgical Mask	Yes	Yes	Yes	No	3	No
Yes	22	Male	Himachal Pradesh	177001	Surgical Mask	Yes	Yes	Yes	No	2	No
Yes	19	Female	Haryana	131001	Surgical Mask	Yes	Yes	Yes	No	1	No
Yes	19	Male	Himachal Pradesh	172001	N95/N99 Respirators	Yes	Yes	Yes	No	1	Yes	No	No	Some are Some are Not
Yes	19	Female	Haryana	131001	N95/N99 Respirators	Yes	Yes	No	No	1	No
Yes	21	Female	Himachal Pradesh	171009	Cotton Mask	Yes	Yes	Yes	No	1	No
Yes	22	Female	Himachal Pradesh	176041	Bandana/Scarf/Handkerchief	No	Yes	No	No	1	No
Yes	20	Female	Himachal Pradesh	173299	Surgical Mask	Yes	Yes	No	No	3	No
Yes	21	Male	Himachal Pradesh	171002	Surgical Mask	Yes	Yes	Yes	No	1	No
Yes	18	Male	Punjab	147001	Cotton Mask	Yes	Yes	No	No	2	No
Yes	22	Male	Himachal Pradesh	171004	N95/N99 Respirators	Yes	Yes	Yes	No	1	No
Yes	19	Female	Himachal Pradesh	173025	Surgical Mask	Yes	Yes	Yes	No	2	No
Yes	20	Male	Delhi(National Capital Territory)	110089	Surgical Mask	Yes	Yes	Yes	No	4	No
Yes	21	Male	Chandigarh	160036	N95/N99 Respirators	Yes	Yes	No	No	2	No
Yes	20	Female	Uttar Pradesh	203204	Surgical Mask	Yes	Yes	No	No	1	No
Yes	18	Male	Delhi(National Capital Territory)	110092	N95/N99 Respirators	Yes	Yes	No	No	3	No
Yes	20	Male	Assam	781001	Surgical Mask	No	Yes	No	No	3	No
Yes	20	Male	Assam	785001	Surgical Mask	No	Yes	Yes	No	1	No
Yes	22	Male	Assam	782002	Cotton Mask	No	Yes	No	No	3	No
Yes	47	Male	Uttar Pradesh	203205	Surgical Mask	Yes	Yes	No	Yes	1	No
Yes	46	Female	Uttar Pradesh	203205	Surgical Mask	Yes	Yes	Yes	No	1	No
Yes	17	Male	Uttar Pradesh	201204	Bandana/Scarf/Handkerchief	Yes	Yes	Yes	No	1	No
Yes	19	Male	Uttar Pradesh	250002	Surgical Mask	Yes	Yes	Yes	No	2	No
Yes	18	Male	Assam	788001	Surgical Mask	Yes	Yes	Yes	No	1	No
Yes	18	Male	Haryana	122001	Cotton Mask	Yes	Yes	Yes	No	1	No
Yes	19	Male	Delhi(National Capital Territory)	201303	Surgical Mask	Yes	Yes	No	No	7	No
Yes	22	Female	Uttar Pradesh	203205	Surgical Mask	Yes	Yes	Yes	No	3	No
Yes	20	Male	Uttar Pradesh	456001	N95/N99 Respirators	Yes	Yes	Yes	No	1	No
Yes	19	Male	Punjab	160104	Surgical Mask	Yes	Yes	Yes	No	1	No
Yes	19	Male	Maharashtra	431001	Surgical Mask	Yes	Yes	No	No	2	No
Yes	20	Female	Punjab	152026	Bandana/Scarf/Handkerchief	Yes	Yes	No	No	1	No
Yes	20	Female	Rajasthan	301001	Surgical Mask	No	Yes	Yes	Yes	5	No
Yes	20	Male	Uttar Pradesh	242001	Surgical Mask	Yes	Yes	No	No	1	No
Yes	18	Female	Uttar Pradesh	201204	No, I don't have access to any of the above.	No	Yes	No	No	1	No
Yes	21	Female	Madhya Pradesh	260002	Bandana/Scarf/Handkerchief	No	Yes	Yes	No	2	No
Yes	21	Female	Assam	784529	Cotton Mask	Yes	Yes	No	No	1	No
Yes	19	Male	Uttar Pradesh	221403	Surgical Mask	Yes	Yes	Yes	No	6	No
Yes	21	Male	Maharashtra	425001	Cotton Mask	No	Yes	Yes	No	6	No
Yes	19	Male	Uttar Pradesh	262001	Bandana/Scarf/Handkerchief	Yes	Yes	Yes	No	2	No
Yes	17	Female	Rajasthan	325221	Cotton Mask	No	Yes	No	No	2	No
Yes	18	Male	Rajasthan	341001	Bandana/Scarf/Handkerchief	No	Yes	Yes	No	3	No
Yes	17	Male	Rajasthan	302017	N95/N99 Respirators	No	Yes	Yes	No	5	No
Yes	20	Female	Uttar Pradesh	250401	Surgical Mask	Yes	Yes	Yes	No	1	No
Yes	18	Male	Uttar Pradesh	201002	N95/N99 Respirators	No	Yes	No	No	1	No
Yes	18	Male	Punjab	147101	Surgical Mask	Yes	Yes	Yes	No	1	No
Yes	18	Male	Uttar Pradesh	201002	N95/N99 Respirators	No	Yes	No	No	1	No
Yes	23	Male	Uttar Pradesh	250401	Cotton Mask	No	Yes	No	No	3	No
Yes	20	Male	Delhi(National Capital Territory)	110052	Surgical Mask	No	Yes	Yes	No	2	No
Yes	20	Female	Uttar Pradesh	226012	Surgical Mask	Yes	Yes	Yes	No	2	No
Yes	19	Male	Karnataka	560047	Surgical Mask	Yes	Yes	No	No	2	No
Yes	19	Male	Karnataka	572103	Cotton Mask	No	Yes	Yes	No	3	No
Yes	18	Female	Uttar Pradesh	243301	Surgical Mask	Yes	Yes	Yes	No	1	No
Yes	30	Female	Uttar Pradesh	245304	Surgical Mask	Yes	Yes	Yes	No	6	Yes	Yes	Yes	Yes
Yes	19	Female	Uttar Pradesh	226005	Surgical Mask	Yes	Yes	Yes	No	4	No
Yes	20	Male	Uttar Pradesh	244221	Cotton Mask	Yes	Yes	Yes	No	2	No
Yes	19	Female	Uttar Pradesh	226010	Bandana/Scarf/Handkerchief	Yes	Yes	Yes	No	2	No
Yes	19	Male	Jharkhand	814112	Surgical Mask	Yes	Yes	No	No	3	No
Yes	18	Male	Telangana	500102	Bandana/Scarf/Handkerchief	No	Yes	Yes	No	5	No
Yes	20	Male	Uttar Pradesh	273015	Surgical Mask	No	Yes	No	No	1	No
Yes	23	Male	Maharashtra	400097	Surgical Mask	No	Yes	No	No	7	No
Yes	19	Male	Rajasthan	322201	Cotton Mask	No	Yes	Yes	No	1	No
Yes	19	Female	Uttar Pradesh	243006	Cotton Mask	Yes	Yes	Yes	No	3	No
Yes	21	Female	Uttar Pradesh	275101	Surgical Mask	Yes	Yes	Yes	No	2	No
Yes	37	Male	Uttar Pradesh	282002	Surgical Mask	No	Yes	Yes	No	3	No
Yes	18	Female	Gujarat	380060	Bandana/Scarf/Handkerchief	No	No	Yes	No	5	No
Yes	24	Female	Telangana	580001	Bandana/Scarf/Handkerchief	Yes	Yes	No	No	1	No
Yes	40	Male	Uttar Pradesh	201002	N95/N99 Respirators	Yes	Yes	Yes	No	4	Yes	No	No	Some are Some are Not
Yes	19	Female	Uttar Pradesh	225001	Surgical Mask	Yes	Yes	Yes	No	8	No
Yes	20	Male	Uttar Pradesh	281123	Bandana/Scarf/Handkerchief	Yes	Yes	Yes	No	4	Yes	Yes	Yes	Some are Some are Not
Yes	30	Male	Delhi(National Capital Territory)	110001	Cotton Mask	Yes	No	No	No	5	No
Yes	17	Female	Uttar Pradesh	211006	Surgical Mask	Yes	Yes	Yes	No	1	No
Yes	22	Male	Delhi(National Capital Territory)	110059	Bandana/Scarf/Handkerchief	No	No	No	No	7	No
Yes	20	Male	Punjab	141801	Surgical Mask	Yes	Yes	Yes	No	3	No
Yes	21	Male	Uttar Pradesh	226028	Surgical Mask	Yes	Yes	Yes	No	2	No
Yes	40	Male	Uttar Pradesh	282009	Bandana/Scarf/Handkerchief	No	Yes	Yes	No	4	No
Yes	20	Female	Assam	781008	Surgical Mask	Yes	Yes	Yes	No	5	No
Yes	70	Male	Chandigarh	440345	No, I don't have access to any of the above.	No	No	No	No	4	No
Yes	20	Female	Gujarat	395007	N95/N99 Respirators	Yes	Yes	Yes	No	7	No
Yes	19	Female	Uttar Pradesh	208011	Cotton Mask	No	Yes	Yes	No	3	No
Yes	22	Male	Uttar Pradesh	250002	Surgical Mask	No	Yes	No	No	4	No
Yes	20	Male	Uttar Pradesh	230001	Surgical Mask	No	Yes	Yes	No	1	No
Yes	20	Male	Uttar Pradesh	284128	Surgical Mask	Yes	Yes	Yes	No	4	No
Yes	19	Female	Uttar Pradesh	282010	Surgical Mask	Yes	Yes	Yes	No	2	No
Yes	21	Male	Uttar Pradesh	282003	Surgical Mask	Yes	Yes	Yes	No	4	No
Yes	26	Male	Uttar Pradesh	282004	N95/N99 Respirators	No	Yes	Yes	No	3	No
Yes	20	Male	Uttar Pradesh	282006	Bandana/Scarf/Handkerchief	No	Yes	No	No	4	No
Yes	21	Male	Uttar Pradesh	282003	N95/N99 Respirators	No	Yes	No	No	8	No
Yes	19	Male	Uttar Pradesh	283201	Bandana/Scarf/Handkerchief	Yes	No	Yes	No	2	No
Yes	19	Male	Uttar Pradesh	204101	Bandana/Scarf/Handkerchief	No	Yes	No	No	1	No
Yes	20	Male	Meghalya	793001	Cotton Mask	No	Yes	Yes	No	4	No
Yes	19	Male	Uttar Pradesh	284003	Surgical Mask	Yes	Yes	No	No	1	No
Yes	22	Male	Uttar Pradesh	282006	Bandana/Scarf/Handkerchief	Yes	Yes	Yes	No	1	Yes	Yes	Yes	Yes
Yes	20	Male	Uttar Pradesh	281502	Bandana/Scarf/Handkerchief	No	No	No	No	1	No
Yes	20	Male	Uttar Pradesh	206242	Surgical Mask	No	Yes	No	Yes	7	No
Yes	29	Male	Uttar Pradesh	282004	Bandana/Scarf/Handkerchief	No	Yes	Yes	No	3	No
Yes	21	Male	Delhi(National Capital Territory)	110078	Surgical Mask	Yes	Yes	Yes	No	1	No
Yes	24	Male	Uttar Pradesh	282001	Cotton Mask	No	Yes	Yes	No	1	No
Yes	20	Female	Uttar Pradesh	243006	Surgical Mask	Yes	Yes	Yes	No	1	No
Yes	24	Male	Uttar Pradesh	282009	Bandana/Scarf/Handkerchief	No	Yes	Yes	No	2	No
Yes	22	Male	Uttar Pradesh	274509	Bandana/Scarf/Handkerchief	No	No	No	No	1	No
Yes	19	Male	Uttarakhand	290801	Surgical Mask	No	Yes	Yes	No	2	No
Yes	20	Male	Uttar Pradesh	283203	N95/N99 Respirators	No	Yes	Yes	No	3	No
Yes	20	Female	Rajasthan	307501	N95/N99 Respirators	Yes	Yes	Yes	No	2	No
Yes	19	Male	Rajasthan	321401	Surgical Mask	No	Yes	Yes	No	1	No
Yes	26	Female	Uttar Pradesh	282005	Surgical Mask	No	Yes	Yes	No	5	No
Yes	26	Male	Uttar Pradesh	233001	Surgical Mask	No	Yes	No	No	2	No
Yes	35	Female	Uttar Pradesh	210001	Cotton Mask	Yes	Yes	Yes	No	7	No
Yes	32	Male	Uttar Pradesh	202001	Surgical Mask	No	Yes	No	No	2	No
Yes	27	Male	Uttar Pradesh	226007	Bandana/Scarf/Handkerchief	Yes	Yes	Yes	No	1	No
Yes	19	Male	Jammu and Kashmir	185131	No, I don't have access to any of the above.	No	Yes	Yes	No	1	No
Yes	20	Female	Nagaland	797112	Cotton Mask	Yes	Yes	Yes	No	6	No
Yes	20	Male	Uttar Pradesh	272202	Surgical Mask	No	Yes	No	No	1	No
Yes	21	Male	Uttar Pradesh	282002	Bandana/Scarf/Handkerchief	No	Yes	Yes	No	4	No
Yes	21	Female	Uttar Pradesh	250001	Bandana/Scarf/Handkerchief	Yes	Yes	Yes	No	3	No
Yes	20	Female	Uttar Pradesh	250002	Surgical Mask	No	Yes	Yes	No	1	No
Yes	18	Male	Uttar Pradesh	226025	Surgical Mask	Yes	Yes	Yes	No	1	No
Yes	19	Male	Uttar Pradesh	282004	N95/N99 Respirators	No	Yes	No	No	6	No
Yes	18	Male	Uttar Pradesh	283203	Surgical Mask	Yes	Yes	Yes	No	5	No
Yes	19	Female	Uttar Pradesh	211003	Cotton Mask	Yes	Yes	Yes	No	1	No
Yes	21	Male	Delhi(National Capital Territory)	110086	Surgical Mask	Yes	Yes	No	No	3	No
Yes	21	Male	Uttar Pradesh	282003	N95/N99 Respirators	No	Yes	No	Yes	9	No
Yes	19	Male	Rajasthan	324005	Surgical Mask	No	Yes	Yes	No	5	No
Yes	21	Male	Uttar Pradesh	282007	Surgical Mask	Yes	Yes	Yes	No	1	No
Yes	21	Male	Delhi(National Capital Territory)	110094	Cotton Mask	No	Yes	Yes	No	2	No
Yes	38	Female	Uttar Pradesh	282003	Bandana/Scarf/Handkerchief	No	Yes	Yes	Yes	1	No
Yes	21	Female	Uttar Pradesh	201002	N95/N99 Respirators	No	Yes	Yes	No	1	No
Yes	20	Male	Uttar Pradesh	244235	N95/N99 Respirators	Yes	Yes	Yes	No	4	No
Yes	20	Female	Uttar Pradesh	282005	Cotton Mask	No	Yes	Yes	No	5	No
Yes	19	Male	Uttar Pradesh	226014	Surgical Mask	Yes	Yes	Yes	No	2	No
Yes	20	Male	Bihar	852127	Cotton Mask	No	Yes	Yes	No	1	Yes	Yes	Yes	Yes
Yes	20	Female	Madhya Pradesh	486001	Bandana/Scarf/Handkerchief	No	Yes	Yes	No	10	No
Yes	28	Female	Maharashtra	422501	Bandana/Scarf/Handkerchief	No	Yes	Yes	No	5	No
Yes	28	Female	Maharashtra	422501	Bandana/Scarf/Handkerchief	No	Yes	Yes	No	5	No
Yes	18	Male	Uttar Pradesh	282002	N95/N99 Respirators	Yes	Yes	Yes	No	3	No
Yes	18	Male	Uttar Pradesh	221005	N95/N99 Respirators	Yes	Yes	Yes	Yes	3	No
Yes	17	Male	Uttar Pradesh	220101	Cotton Mask	Yes	Yes	Yes	No	2	No
Yes	18	Male	Uttar Pradesh	221001	Surgical Mask	Yes	Yes	Yes	No	7	No
Yes	18	Male	Uttar Pradesh	221002	Surgical Mask	Yes	Yes	Yes	No	2	No
Yes	18	Female	Uttar Pradesh	221001	N95/N99 Respirators	Yes	Yes	Yes	No	5	No
Yes	18	Female	Uttar Pradesh	221005	Surgical Mask	Yes	Yes	Yes	No	2	No
Yes	17	Male	Uttarakhand	248001	Surgical Mask	Yes	Yes	Yes	No	2	No
Yes	20	Female	Uttar Pradesh	282009	Surgical Mask	Yes	Yes	Yes	No	1	No
Yes	19	Female	Uttar Pradesh	226002	N95/N99 Respirators	No	Yes	No	Yes	8	No
Yes	18	Male	Madhya Pradesh	482001	N95/N99 Respirators	Yes	Yes	Yes	No	3	No
Yes	51	Male	Uttar Pradesh	226025	Surgical Mask	Yes	Yes	Yes	No	2	No
Yes	21	Female	Maharashtra	400022	Cotton Mask	Yes	Yes	No	No	7	No
Yes	43	Female	Uttar Pradesh	250001	Cotton Mask	No	Yes	Yes	No	1	No
Yes	20	Female	Maharashtra	400022	Bandana/Scarf/Handkerchief	No	Yes	Yes	No	4	No
Yes	22	Male	Maharashtra	422009	Bandana/Scarf/Handkerchief	Yes	Yes	Yes	No	7	Yes	No	Yes	Some are Some are Not
Yes	18	Male	Madhya Pradesh	482003	Surgical Mask	Yes	Yes	Yes	No	1	No
Yes	20	Male	Madhya Pradesh	482001	Cotton Mask	Yes	Yes	No	No	5	No
Yes	22	Female	Maharashtra	400024	N95/N99 Respirators	Yes	Yes	Yes	No	2	Yes	Yes	Yes	Some are Some are Not
Yes	23	Female	Delhi(National Capital Territory)	110001	Surgical Mask	Yes	Yes	Yes	No	8	Yes	Yes	Yes	Some are Some are Not
Yes	21	Female	Delhi(National Capital Territory)	110092	Bandana/Scarf/Handkerchief	Yes	Yes	Yes	No	1	No
Yes	21	Female	Delhi(National Capital Territory)	110015	Surgical Mask	Yes	Yes	No	No	5	No
Yes	22	Female	Delhi(National Capital Territory)	110084	Bandana/Scarf/Handkerchief	Yes	Yes	Yes	No	2	No
Yes	20	Female	Haryana	123401	Surgical Mask	Yes	Yes	Yes	No	3	No
Yes	22	Female	Uttar Pradesh	201011	Bandana/Scarf/Handkerchief	Yes	Yes	Yes	No	2	No
Yes	22	Female	Bihar	845438	Cotton Mask	No	Yes	Yes	No	1	No
Yes	20	Female	Dadra and Nagar Haveli and Daman and Diu	396210	N95/N99 Respirators	No	Yes	Yes	No	2	No
Yes	20	Female	Delhi(National Capital Territory)	110065	N95/N99 Respirators	No	Yes	Yes	No	4	No
Yes	21	Female	Delhi(National Capital Territory)	110007	N95/N99 Respirators	Yes	Yes	No	No	7	No
Yes	20	Female	Delhi(National Capital Territory)	110051	Surgical Mask	No	Yes	No	No	6	No
Yes	20	Male	Maharashtra	444705	Bandana/Scarf/Handkerchief	Yes	Yes	Yes	No	2	No
Yes	20	Female	Haryana	123001	Bandana/Scarf/Handkerchief	No	Yes	Yes	No	2	No
Yes	21	Female	Delhi(National Capital Territory)	110016	N95/N99 Respirators	Yes	Yes	No	Yes	3	No
Yes	20	Female	Delhi(National Capital Territory)	110010	N95/N99 Respirators	No	Yes	Yes	No	1	No
Yes	19	Female	Bihar	805110	N95/N99 Respirators	No	Yes	Yes	No	1	No
Yes	21	Female	Delhi(National Capital Territory)	110043	Surgical Mask	Yes	Yes	No	No	2	No
Yes	23	Female	Delhi(National Capital Territory)	110001	Bandana/Scarf/Handkerchief	Yes	Yes	Yes	No	4	No
Yes	22	Female	Punjab	141012	N95/N99 Respirators	Yes	Yes	Yes	No	4	No
Yes	23	Female	Uttarakhand	246174	Cotton Mask	No	Yes	No	No	5	No
Yes	20	Female	Delhi(National Capital Territory)	110001	Cotton Mask	Yes	Yes	No	No	2	No
Yes	21	Female	Uttar Pradesh	201309	N95/N99 Respirators	Yes	Yes	Yes	No	6	No
Yes	22	Female	Delhi(National Capital Territory)	110067	N95/N99 Respirators	Yes	Yes	No	No	3	No
Yes	22	Female	Arunachal Pradesh	791111	Surgical Mask	Yes	Yes	Yes	No	2	No
Yes	21	Male	Maharashtra	410501	Cotton Mask	Yes	Yes	Yes	No	1	No
Yes	21	Male	Maharashtra	410501	Cotton Mask	Yes	Yes	Yes	No	1	No
Yes	21	Male	Maharashtra	410501	Cotton Mask	Yes	Yes	Yes	No	1	No
Yes	21	Male	Maharashtra	411039	Bandana/Scarf/Handkerchief	Yes	Yes	Yes	No	1	Yes	No	Yes	Yes
Yes	22	Male	Maharashtra	410501	Bandana/Scarf/Handkerchief	Yes	Yes	No	No	5	No
Yes	21	Male	Maharashtra	412101	Bandana/Scarf/Handkerchief	Yes	Yes	Yes	No	1	No
Yes	21	Male	Maharashtra	410501	Surgical Mask	Yes	Yes	No	No	4	No
Yes	20	Female	Maharashtra	424304	Surgical Mask	Yes	Yes	Yes	No	2	No
Yes	20	Male	Uttar Pradesh	201001	Surgical Mask	Yes	Yes	Yes	No	3	No
Yes	17	Female	Uttar Pradesh	201001	N95/N99 Respirators	Yes	Yes	Yes	No	1	No
Yes	27	Female	Uttar Pradesh	226001	Surgical Mask	Yes	Yes	Yes	No	7	Yes	Yes	Yes	Yes
Yes	22	Male	Maharashtra	413606	Bandana/Scarf/Handkerchief	Yes	Yes	Yes	No	5	No
Yes	20	Female	Uttar Pradesh	201017	N95/N99 Respirators	Yes	Yes	Yes	No	3	No
Yes	20	Female	Maharashtra	411018	Cotton Mask	Yes	Yes	Yes	No	1	No
Yes	20	Male	Maharashtra	443301	Surgical Mask	Yes	Yes	Yes	No	1	No
Yes	22	Female	Rajasthan	342001	Cotton Mask	No	No	No	No	2	No
Yes	20	Male	Uttar Pradesh	282001	N95/N99 Respirators	Yes	Yes	Yes	Yes	7	No
Yes	21	Male	Maharashtra	413736	Surgical Mask	Yes	Yes	Yes	No	1	Yes	No	Yes	Some are Some are Not
Yes	18	Female	Maharashtra	400091	N95/N99 Respirators	Yes	Yes	Yes	No	1	No
Yes	21	Male	Uttar Pradesh	221007	Cotton Mask	No	Yes	No	No	1	No
Yes	20	Male	Bihar	841227	Surgical Mask	Yes	Yes	Yes	No	2	No
Yes	20	Male	Uttar Pradesh	262001	Surgical Mask	No	Yes	Yes	No	2	No
Yes	21	Male	Uttar Pradesh	273015	Surgical Mask	No	Yes	No	No	1	No
Yes	20	Male	Uttar Pradesh	292001	Surgical Mask	Yes	Yes	No	No	4	Yes	No	Yes	Some are Some are Not
Yes	20	Male	Bihar	854105	Surgical Mask	Yes	Yes	Yes	No	1	No
Yes	20	Male	Uttar Pradesh	283125	N95/N99 Respirators	Yes	Yes	Yes	No	1	Yes	Yes	Yes	Yes
Yes	22	Male	Delhi(National Capital Territory)	110093	Surgical Mask	No	Yes	Yes	No	5	No
Yes	20	Male	Rajasthan	304804	Surgical Mask	No	Yes	Yes	No	1	No
Yes	21	Male	Delhi(National Capital Territory)	110094	Bandana/Scarf/Handkerchief	Yes	Yes	Yes	No	1	No
Yes	20	Female	Uttar Pradesh	244412	Bandana/Scarf/Handkerchief	No	Yes	Yes	No	2	No
Yes	19	Male	Delhi(National Capital Territory)	110096	Bandana/Scarf/Handkerchief	No	Yes	No	No	3	No
Yes	19	Male	Uttar Pradesh	273008	N95/N99 Respirators	Yes	Yes	Yes	No	1	No
Yes	27	Male	Andhra Pradesh	521137	Surgical Mask	No	Yes	No	No	5	Yes	No	No	Some are Some are Not
Yes	29	Male	Telangana	509209	Surgical Mask	Yes	Yes	Yes	No	3	No
Yes	29	Male	Telangana	509209	Surgical Mask	Yes	Yes	Yes	No	3	No
Yes	18	Female	Telangana	500085	Surgical Mask	No	Yes	Yes	No	3	No
Yes	20	Male	Andhra Pradesh	522659	No, I don't have access to any of the above.	No	No	No	No	1	No
Yes	22	Female	Haryana	127022	Bandana/Scarf/Handkerchief	No	Yes	No	No	5	No
Yes	24	Male	Haryana	124501	Bandana/Scarf/Handkerchief	Yes	Yes	Yes	No	1	No
Yes	22	Male	Haryana	127021	Surgical Mask	No	Yes	Yes	No	3	No
Yes	22	Male	Haryana	125120	Cotton Mask	Yes	Yes	Yes	No	1	No
Yes	19	Male	Bihar	812001	Surgical Mask	Yes	Yes	Yes	No	6	No
Yes	19	Male	Haryana	131001	No, I don't have access to any of the above.	No	Yes	No	No	2	No
Yes	19	Male	Delhi(National Capital Territory)	110053	Surgical Mask	No	Yes	Yes	No	4	No
Yes	22	Female	Delhi(National Capital Territory)	110058	Bandana/Scarf/Handkerchief	No	Yes	No	No	4	No
Yes	21	Male	Haryana	125001	Surgical Mask	No	Yes	No	No	3	No
Yes	20	Male	Telangana	507101	Bandana/Scarf/Handkerchief	No	Yes	Yes	No	2	No
Yes	21	Male	Maharashtra	400022	Surgical Mask	Yes	Yes	No	No	3	No
Yes	20	Female	Andhra Pradesh	516130	Cotton Mask	Yes	Yes	Yes	No	1	No
Yes	20	Female	Delhi(National Capital Territory)	110075	Surgical Mask	Yes	Yes	No	No	6	No
Yes	18	Female	Haryana	125001	Surgical Mask	No	Yes	Yes	No	3	No
Yes	20	Male	Andhra Pradesh	533342	Bandana/Scarf/Handkerchief	No	Yes	No	No	5	No
Yes	21	Male	Andhra Pradesh	533345	Surgical Mask	No	Yes	Yes	No	1	No
Yes	20	Male	Telangana	500037	Surgical Mask	No	Yes	Yes	No	1	Yes	No	No	Some are Some are Not
Yes	20	Male	Andhra Pradesh	533342	Bandana/Scarf/Handkerchief	Yes	Yes	Yes	No	1	No
Yes	18	Male	Andhra Pradesh	533342	Bandana/Scarf/Handkerchief	Yes	Yes	Yes	No	2	No
Yes	19	Female	Uttar Pradesh	262001	Surgical Mask	No	Yes	Yes	No	1	No
Yes	19	Female	Delhi(National Capital Territory)	110077	Cotton Mask	Yes	Yes	Yes	No	8	No
Yes	19	Male	Uttar Pradesh	244921	Surgical Mask	Yes	Yes	Yes	No	1	No
Yes	22	Male	Odisha	410501	Surgical Mask	Yes	Yes	Yes	No	5	No
Yes	27	Female	Uttar Pradesh	226001	Surgical Mask	Yes	Yes	Yes	No	7	Yes	Yes	Yes	Yes
Yes	18	Male	Andhra Pradesh	533342	Surgical Mask	Yes	Yes	Yes	No	5	No
Yes	19	Male	Uttar Pradesh	262001	Cotton Mask	No	No	No	No	2	No
Yes	19	Female	Uttarakhand	263001	N95/N99 Respirators	Yes	Yes	Yes	No	1	No
Yes	19	Female	Uttarakhand	263001	N95/N99 Respirators	Yes	Yes	Yes	No	1	No
Yes	19	Female	Uttarakhand	263001	N95/N99 Respirators	Yes	Yes	Yes	No	1	No
Yes	19	Male	Uttar Pradesh	277001	Surgical Mask	No	Yes	Yes	No	2	No
Yes	18	Female	Bihar	851111	N95/N99 Respirators	No	Yes	Yes	No	1	No
Yes	20	Female	Uttar Pradesh	208001	Surgical Mask	Yes	Yes	No	No	3	No
Yes	22	Female	Delhi(National Capital Territory)	110092	Surgical Mask	No	No	No	No	7	No
Yes	20	Female	Uttar Pradesh	208001	Surgical Mask	Yes	Yes	No	No	3	No
Yes	20	Female	Andhra Pradesh	520001	Surgical Mask	Yes	Yes	Yes	No	6	No
Yes	19	Female	Uttar Pradesh	262001	Bandana/Scarf/Handkerchief	Yes	Yes	Yes	No	1	No
Yes	20	Female	Tamil Nadu	627114	N95/N99 Respirators	No	Yes	Yes	No	1	No
Yes	23	Male	Gujarat	387001	N95/N99 Respirators	Yes	Yes	No	Yes	1	Yes	Yes	Yes	Some are Some are Not
Yes	22	Male	Uttar Pradesh	211001	Cotton Mask	No	Yes	No	No	2	No
Yes	20	Male	Uttar Pradesh	281001	Surgical Mask	Yes	Yes	No	No	1	No
Yes	24	Male	Uttar Pradesh	221104	Surgical Mask	Yes	Yes	No	No	1	No
Yes	23	Male	Maharashtra	425201	Surgical Mask	Yes	Yes	Yes	No	5	No
Yes	22	Male	Rajasthan	335523	Surgical Mask	No	Yes	Yes	No	2	No
Yes	22	Male	Maharashtra	425201	N95/N99 Respirators	Yes	Yes	Yes	No	4	No
Yes	19	Female	Uttar Pradesh	208024	Cotton Mask	Yes	Yes	Yes	No	2	No
Yes	21	Male	Maharashtra	416415	Cotton Mask	Yes	Yes	Yes	No	4	No
Yes	24	Male	Maharashtra	425201	Cotton Mask	Yes	Yes	Yes	No	2	No
Yes	88	Female	Dadra and Nagar Haveli and Daman and Diu	478965	Bandana/Scarf/Handkerchief	No	No	No	No	10	No
Yes	24	Male	Gujarat	388001	Surgical Mask	Yes	Yes	Yes	No	1	No
Yes	19	Female	Uttarakhand	263139	N95/N99 Respirators	No	Yes	Yes	No	2	No
Yes	24	Male	Maharashtra	422009	Bandana/Scarf/Handkerchief	No	Yes	Yes	No	5	No
Yes	23	Male	Maharashtra	424101	Bandana/Scarf/Handkerchief	Yes	Yes	Yes	No	1	No
Yes	24	Female	Maharashtra	421001	Surgical Mask	Yes	Yes	Yes	No	5	No
Yes	47	Male	Uttar Pradesh	208024	Cotton Mask	No	Yes	Yes	No	1	No
Yes	47	Male	Uttar Pradesh	208024	Cotton Mask	No	Yes	Yes	No	1	No
Yes	21	Male	Haryana	131001	Surgical Mask	No	Yes	Yes	No	5	No
Yes	22	Female	Uttar Pradesh	208024	Bandana/Scarf/Handkerchief	No	Yes	Yes	No	3	No
Yes	22	Female	Maharashtra	440001	Cotton Mask	No	Yes	Yes	No	1	No
Yes	22	Male	Maharashtra	400709	Cotton Mask	No	Yes	Yes	No	3	No
Yes	19	Female	Chhattisgarh	493118	Bandana/Scarf/Handkerchief	No	Yes	Yes	No	4	No
Yes	23	Female	Maharashtra	400102	Bandana/Scarf/Handkerchief	No	Yes	Yes	No	7	No
Yes	38	Female	Uttar Pradesh	226030	Surgical Mask	Yes	Yes	Yes	No	2	No
Yes	20	Male	Uttar Pradesh	284001	N95/N99 Respirators	No	Yes	No	No	5	No
Yes	20	Female	Uttarakhand	248001	Cotton Mask	Yes	Yes	No	No	1	No
Yes	19	Female	Uttar Pradesh	243006	Surgical Mask	Yes	Yes	Yes	No	2	No
Yes	24	Male	Uttar Pradesh	282003	No, I don't have access to any of the above.	Yes	Yes	No	No	8	No
Yes	19	Female	Uttar Pradesh	202125	Surgical Mask	No	Yes	Yes	No	2	No
Yes	21	Male	Mizoram	226757	N95/N99 Respirators	Yes	Yes	Yes	No	1	No
Yes	21	Male	Uttar Pradesh	226005	N95/N99 Respirators	No	Yes	Yes	No	5	No
Yes	21	Male	Uttar Pradesh	223001	Surgical Mask	No	Yes	Yes	No	1	No
Yes	20	Male	Uttar Pradesh	208002	N95/N99 Respirators	Yes	Yes	Yes	No	2	No
Yes	25	Male	Uttar Pradesh	222135	Cotton Mask	Yes	Yes	No	No	1	No
Yes	26	Male	Uttar Pradesh	244001	N95/N99 Respirators	Yes	Yes	Yes	No	2	Yes	Yes	Yes	Yes
Yes	25	Male	Uttar Pradesh	226003	Surgical Mask	Yes	Yes	No	No	8	Yes	No	No	Some are Some are Not
Yes	22	Female	Uttar Pradesh	283111	Surgical Mask	No	Yes	No	No	5	No
Yes	25	Male	Uttar Pradesh	221011	Surgical Mask	Yes	Yes	Yes	No	1	No
Yes	25	Male	Uttar Pradesh	201011	Surgical Mask	Yes	Yes	Yes	No	1	No
Yes	22	Male	Delhi(National Capital Territory)	201308	Surgical Mask	Yes	Yes	Yes	No	8	No
Yes	45	Male	Uttar Pradesh	226003	N95/N99 Respirators	Yes	Yes	Yes	No	2	No
Yes	21	Male	Uttar Pradesh	282007	Surgical Mask	Yes	Yes	No	No	7	No
Yes	24	Male	Uttar Pradesh	285121	Surgical Mask	No	Yes	Yes	No	3	No
Yes	24	Male	Uttar Pradesh	277209	Surgical Mask	No	Yes	Yes	No	5	No
Yes	19	Male	Uttar Pradesh	226023	Surgical Mask	Yes	Yes	Yes	No	6	No
Yes	21	Male	Andhra Pradesh	522413	Bandana/Scarf/Handkerchief	No	Yes	Yes	No	1	No
Yes	20	Male	Gujarat	382026	Cotton Mask	Yes	Yes	No	No	4	No
Yes	22	Male	Gujarat	380027	Surgical Mask	Yes	Yes	Yes	No	7	No
Yes	20	Male	Bihar	854301	N95/N99 Respirators	No	Yes	No	No	3	No
Yes	19	Male	Gujarat	390022	Surgical Mask	Yes	Yes	Yes	No	1	No
Yes	24	Male	Uttar Pradesh	282002	Surgical Mask	No	Yes	No	No	7	Yes	No	No	Some are Some are Not
Yes	23	Male	Uttar Pradesh	226020	N95/N99 Respirators	Yes	Yes	Yes	No	9	Yes	No	No	No
Yes	20	Male	Uttar Pradesh	282004	Surgical Mask	Yes	Yes	Yes	No	2	No
Yes	20	Male	Uttar Pradesh	231213	Surgical Mask	Yes	Yes	Yes	No	1	No
Yes	18	Male	Gujarat	394105	Cotton Mask	Yes	Yes	Yes	No	1	No
Yes	20	Male	Gujarat	390023	Surgical Mask	No	Yes	Yes	No	2	No
Yes	20	Male	Uttar Pradesh	208026	Cotton Mask	No	Yes	Yes	No	3	No
Yes	20	Male	Uttar Pradesh	208012	N95/N99 Respirators	Yes	Yes	Yes	No	3	No
Yes	19	Male	Uttar Pradesh	284403	Cotton Mask	No	Yes	No	No	1	No
Yes	23	Male	Uttar Pradesh	210201	No, I don't have access to any of the above.	No	No	Yes	No	1	No
Yes	21	Male	Uttar Pradesh	210507	No, I don't have access to any of the above.	No	Yes	Yes	No	5	No
Yes	22	Female	Uttar Pradesh	226012	Bandana/Scarf/Handkerchief	Yes	Yes	Yes	Yes	6	No
Yes	23	Male	Maharashtra	425201	Bandana/Scarf/Handkerchief	No	Yes	Yes	No	1	No
Yes	26	Male	Goa	420321	Surgical Mask	Yes	Yes	No	No	7	Yes	No	No	Yes
Yes	19	Female	Haryana	131001	Cotton Mask	No	Yes	No	No	1	No
Yes	19	Male	Haryana	133203	Bandana/Scarf/Handkerchief	Yes	Yes	Yes	No	1	No
Yes	19	Male	Haryana	132039	Surgical Mask	No	Yes	No	No	1	No
Yes	20	Female	Haryana	123303	Bandana/Scarf/Handkerchief	No	Yes	No	No	1	No
Yes	20	Female	Haryana	136118	Surgical Mask	No	Yes	Yes	No	3	No
Yes	20	Female	Haryana	124001	Surgical Mask	Yes	Yes	Yes	No	1	No
Yes	19	Female	Haryana	123001	Bandana/Scarf/Handkerchief	No	Yes	Yes	No	1	Yes	Yes	Yes	Some are Some are Not
Yes	20	Female	Haryana	124103	Cotton Mask	Yes	Yes	Yes	No	4	No
Yes	41	Male	Uttar Pradesh	211002	Cotton Mask	No	Yes	No	No	3	No
Yes	19	Female	Bihar	852123	Surgical Mask	Yes	Yes	Yes	No	10	No
Yes	19	Male	Haryana	124001	Surgical Mask	Yes	Yes	No	No	3	No
Yes	18	Male	Haryana	126102	Surgical Mask	No	Yes	No	No	1	No
Yes	19	Female	Haryana	131001	Surgical Mask	Yes	Yes	No	No	4	No
Yes	19	Female	Haryana	125033	Cotton Mask	Yes	Yes	Yes	No	5	No
Yes	20	Female	Haryana	131305	Cotton Mask	Yes	Yes	No	No	1	No
Yes	20	Male	Uttar Pradesh	282007	N95/N99 Respirators	No	Yes	No	No	2	No
Yes	19	Male	Haryana	132039	Surgical Mask	Yes	Yes	No	No	1	No
Yes	23	Female	Madhya Pradesh	466001	Surgical Mask	Yes	Yes	No	No	5	No
Yes	20	Male	Uttar Pradesh	208011	Bandana/Scarf/Handkerchief	No	Yes	Yes	No	5	No
Yes	19	Male	Haryana	136128	Bandana/Scarf/Handkerchief	Yes	Yes	Yes	No	6	No
Yes	21	Female	Rajasthan	302019	Surgical Mask	Yes	Yes	Yes	No	1	No
Yes	19	Male	Punjab	148101	Surgical Mask	Yes	Yes	Yes	No	3	No
Yes	21	Male	Uttar Pradesh	221005	N95/N99 Respirators	Yes	Yes	Yes	No	3	No
Yes	20	Male	Punjab	142047	No, I don't have access to any of the above.	No	No	No	No	1	No
Yes	21	Male	Uttar Pradesh	221005	Bandana/Scarf/Handkerchief	No	Yes	Yes	No	5	No
Yes	22	Male	Uttar Pradesh	221005	N95/N99 Respirators	No	Yes	No	No	5	No
Yes	18	Male	Uttar Pradesh	221005	Bandana/Scarf/Handkerchief	No	Yes	No	Yes	7	No
Yes	21	Male	Uttar Pradesh	247001	No, I don't have access to any of the above.	No	Yes	No	No	5	No
Yes	21	Male	Uttar Pradesh	221007	Cotton Mask	No	Yes	No	No	1	No
Yes	25	Female	Delhi(National Capital Territory)	110001	Surgical Mask	Yes	Yes	Yes	No	2	Yes	Yes	Yes	Yes
Yes	19	Female	Uttar Pradesh	226003	N95/N99 Respirators	Yes	Yes	Yes	No	8	No
Yes	21	Male	Uttar Pradesh	226003	Surgical Mask	Yes	Yes	No	No	5	No
Yes	20	Female	Uttar Pradesh	275101	No, I don't have access to any of the above.	Yes	Yes	Yes	No	1	No
Yes	16	Male	Uttar Pradesh	242001	Cotton Mask	No	Yes	Yes	No	1	No
Yes	20	Female	Uttarakhand	246174	Cotton Mask	Yes	Yes	No	No	1	No
Yes	37	Male	Karnataka	560060	Surgical Mask	No	Yes	Yes	No	1	No
Yes	22	Male	Uttar Pradesh	208004	No, I don't have access to any of the above.	No	Yes	Yes	No	1	No
Yes	22	Male	Jharkhand	831004	Surgical Mask	No	Yes	Yes	No	2	No
Yes	25	Male	Uttarakhand	248001	Cotton Mask	Yes	Yes	Yes	No	3	No
Yes	24	Male	Uttar Pradesh	212601	N95/N99 Respirators	No	Yes	Yes	Yes	2	No
Yes	25	Male	Uttar Pradesh	208001	Bandana/Scarf/Handkerchief	No	Yes	Yes	No	1	No
Yes	20	Female	Uttar Pradesh	221001	Surgical Mask	Yes	Yes	No	No	1	No
Yes	24	Male	Uttar Pradesh	221010	Surgical Mask	Yes	Yes	No	No	3	No
Yes	24	Male	Uttar Pradesh	277209	Surgical Mask	Yes	Yes	Yes	No	5	No
Yes	58	Male	Uttar Pradesh	208001	Bandana/Scarf/Handkerchief	No	Yes	Yes	Yes	3	No
Yes	22	Female	Andhra Pradesh	521101	Surgical Mask	No	Yes	Yes	No	3	Yes	No	No	Some are Some are Not
Yes	23	Male	Uttar Pradesh	208019	Surgical Mask	No	Yes	Yes	No	1	No
Yes	21	Male	Uttar Pradesh	226017	Bandana/Scarf/Handkerchief	Yes	Yes	Yes	No	4	No
Yes	25	Male	Uttar Pradesh	274305	Cotton Mask	No	Yes	No	No	2	Yes	No	No	Some are Some are Not
Yes	20	Male	Rajasthan	304804	Surgical Mask	No	Yes	Yes	No	1	No
Yes	45	Male	Uttar Pradesh	284204	Cotton Mask	Yes	Yes	Yes	Yes	4	No
Yes	20	Female	Uttarakhand	246174	Cotton Mask	Yes	Yes	No	No	1	No
Yes	37	Male	Uttar Pradesh	282007	Surgical Mask	No	Yes	Yes	No	1	No
Yes	37	Male	Uttar Pradesh	282001	Surgical Mask	Yes	Yes	Yes	No	1	No
Yes	23	Male	Himachal Pradesh	173229	Surgical Mask	Yes	Yes	Yes	No	1	No
Yes	22	Male	Karnataka	575116	N95/N99 Respirators	Yes	Yes	Yes	No	3	Yes	Yes	Yes	Yes
Yes	23	Female	Maharashtra	400602	Surgical Mask	Yes	Yes	Yes	No	3	No
Yes	21	Female	Himachal Pradesh	171005	Bandana/Scarf/Handkerchief	No	Yes	No	No	4	No
Yes	22	Female	Haryana	122001	N95/N99 Respirators	Yes	Yes	Yes	No	1	No
Yes	21	Female	Maharashtra	401107	Surgical Mask	Yes	Yes	Yes	No	5	No
Yes	15	Female	Maharashtra	401107	Surgical Mask	No	Yes	Yes	No	3	No
Yes	25	Male	Uttar Pradesh	208003	N95/N99 Respirators	Yes	Yes	Yes	No	2	Yes	No	No	No
Yes	25	Male	Uttar Pradesh	208003	N95/N99 Respirators	Yes	Yes	Yes	No	2	Yes	No	No	No
Yes	24	Female	Bihar	800020	N95/N99 Respirators	Yes	Yes	Yes	Yes	7	Yes	No	Yes	Some are Some are Not
Yes	25	Male	Bihar	848101	N95/N99 Respirators	Yes	Yes	Yes	No	4	No
Yes	20	Female	Chhattisgarh	492001	N95/N99 Respirators	Yes	Yes	Yes	No	6	No
Yes	24	Female	West Bengal	743248	Surgical Mask	Yes	Yes	Yes	No	1	No
Yes	23	Male	Maharashtra	410210	Surgical Mask	Yes	Yes	No	No	5	No
Yes	24	Female	Delhi(National Capital Territory)	110052	Surgical Mask	Yes	Yes	Yes	No	4	No
Yes	20	Male	Haryana	125001	Surgical Mask	Yes	Yes	No	No	5	No
Yes	26	Male	Madhya Pradesh	462420	Surgical Mask	Yes	No	Yes	Yes	5	No
Yes	21	Male	Delhi(National Capital Territory)	110093	N95/N99 Respirators	Yes	Yes	Yes	No	4	No
Yes	25	Male	Uttar Pradesh	246725	Cotton Mask	No	Yes	Yes	No	2	No
Yes	25	Male	Uttar Pradesh	244235	Surgical Mask	No	Yes	Yes	No	1	No
Yes	18	Male	Uttar Pradesh	201304	Surgical Mask	No	Yes	No	No	1	No
Yes	22	Male	Uttar Pradesh	203411	Bandana/Scarf/Handkerchief	No	Yes	Yes	No	2	No
Yes	19	Male	Uttar Pradesh	208014	N95/N99 Respirators	Yes	Yes	No	No	2	No
Yes	20	Female	Madhya Pradesh	452009	Surgical Mask	Yes	No	Yes	No	3	No
Yes	20	Male	Uttar Pradesh	250001	Bandana/Scarf/Handkerchief	No	Yes	No	No	1	No
